# Supplementary material for: SCALE-UP II: protocol for a pragmatic randomised trial examining population health management interventions to increase the uptake of at-home COVID-19 testing in community health centres
Source: PubMed Central journal article supplement — BMJ Open. 2024 Mar 20;14(3):e081455. doi: 10.1136/bmjopen-2023-081455 (PMC10961568; doi:10.1136/bmjopen-2023-081455), 2024-03-20
Supplement: bmjopen-2023-081455.draft_revisions.pdf [file bmjopen-2023-081455.draft_revisions.pdf]

# BMJ Open

BMJ Open is committed to open peer review. As part of this commitment we make the peer review history of every article we publish publicly available.

When an article is published we post the peer reviewers' comments and the authors' responses online. We also post the versions of the paper that were used during peer review. These are the versions that the peer review comments apply to.

The versions of the paper that follow are the versions that were submitted during the peer review process. They are not the versions of record or the final published versions. They should not be cited or distributed as the published version of this manuscript.

BMJ Open is an open access journal and the full, final, typeset and author-corrected version of record of the manuscript is available on our site with no access controls, subscription charges or pay-per-view fees (<http://bmjopen.bmj.com>).

If you have any questions on BMJ Open's open peer review process please email [info.bmjopen@bmj.com](mailto:info.bmjopen@bmj.com)

# BMJ Open

## SCALE-UP II: Protocol for a Pragmatic Randomized Trial Examining Population Health Management Interventions to Increase the Uptake of At-Home COVID-19 Testing in Community Health Centers

|                               |                                                                                                                                                                                                                                                                                                                                                                                                                                                                                                                                                                                                                                                                                                                                                                                                                                                                                                                                                                                                                                                                                                                                                                                                                                                                                                                                                                                                                                                                                                                                                                                                                                                                                                                                                                                                                         |
|-------------------------------|-------------------------------------------------------------------------------------------------------------------------------------------------------------------------------------------------------------------------------------------------------------------------------------------------------------------------------------------------------------------------------------------------------------------------------------------------------------------------------------------------------------------------------------------------------------------------------------------------------------------------------------------------------------------------------------------------------------------------------------------------------------------------------------------------------------------------------------------------------------------------------------------------------------------------------------------------------------------------------------------------------------------------------------------------------------------------------------------------------------------------------------------------------------------------------------------------------------------------------------------------------------------------------------------------------------------------------------------------------------------------------------------------------------------------------------------------------------------------------------------------------------------------------------------------------------------------------------------------------------------------------------------------------------------------------------------------------------------------------------------------------------------------------------------------------------------------|
| Journal:                      | <i>BMJ Open</i>                                                                                                                                                                                                                                                                                                                                                                                                                                                                                                                                                                                                                                                                                                                                                                                                                                                                                                                                                                                                                                                                                                                                                                                                                                                                                                                                                                                                                                                                                                                                                                                                                                                                                                                                                                                                         |
| Manuscript ID                 | bmjopen-2023-081455                                                                                                                                                                                                                                                                                                                                                                                                                                                                                                                                                                                                                                                                                                                                                                                                                                                                                                                                                                                                                                                                                                                                                                                                                                                                                                                                                                                                                                                                                                                                                                                                                                                                                                                                                                                                     |
| Article Type:                 | Protocol                                                                                                                                                                                                                                                                                                                                                                                                                                                                                                                                                                                                                                                                                                                                                                                                                                                                                                                                                                                                                                                                                                                                                                                                                                                                                                                                                                                                                                                                                                                                                                                                                                                                                                                                                                                                                |
| Date Submitted by the Author: | 31-Oct-2023                                                                                                                                                                                                                                                                                                                                                                                                                                                                                                                                                                                                                                                                                                                                                                                                                                                                                                                                                                                                                                                                                                                                                                                                                                                                                                                                                                                                                                                                                                                                                                                                                                                                                                                                                                                                             |
| Complete List of Authors:     | <p>Del Fiol, Guilherme; University of Utah, Department of Biomedical Informatics<br/> Orleans, Brian; University of Utah<br/> Kuzmenko, Tatyana; University of Utah, Department of Biomedical Informatics<br/> Chipman, Jonathan; University of Utah, Department of Population Health Sciences<br/> Greene, Tom; University of Utah, Population Health Sciences<br/> Martinez, Anna; University of Utah<br/> Wirth, Jennifer; University of Utah<br/> Meads, Ray; University of Utah<br/> Kaphingst, Kim; University of Utah Health Huntsman Cancer Institute, Department of Communication<br/> Gibson, Bryan; University of Utah, Department of Biomedical Informatics<br/> Kawamoto, K; The University of Utah<br/> King, Andy; University of Utah, Department of Communication<br/> Siaperas, Tracey; Association for Utah Community Health<br/> Hughes, Shlisa; Association for Utah Community Health<br/> Pruhs, Alan; Association for Utah Community Health<br/> Pariera Dinkins, Courtney; Association for Utah Community Health<br/> Lam, Cho; University of Utah, Department of Population Health Sciences<br/> Pierce, Joni; University of Utah, Department of Biomedical Informatics<br/> Benson, Ryzen; University of Utah, Department of Biomedical Informatics<br/> Borsato, Emerson; University of Utah, Department of Biomedical Informatics<br/> Cornia, Ryan; University of Utah, Department of Biomedical Informatics<br/> Stevens, Leticia; University of Utah, Department of Biomedical Informatics<br/> Bradshaw, Richard; University of Utah, Department of Biomedical Informatics<br/> Schlechter, Chelsey; University of Utah Health Huntsman Cancer Institute, Center for Health Outcomes and Population Equity<br/> Wetter, David; Huntsman Cancer Institute, Population Health Sciences</p> |
| Keywords:                     | COVID-19, Health Equity, Health informatics < BIOTECHNOLOGY & BIOINFORMATICS, Information technology < BIOTECHNOLOGY & BIOINFORMATICS, Public health < INFECTIOUS DISEASES                                                                                                                                                                                                                                                                                                                                                                                                                                                                                                                                                                                                                                                                                                                                                                                                                                                                                                                                                                                                                                                                                                                                                                                                                                                                                                                                                                                                                                                                                                                                                                                                                                              |

1  
2  
3  
4  
5  
6  
7  
8  
9  
10  
11  
12  
13  
14  
15  
16  
17  
18  
19  
20  
21  
22  
23  
24  
25  
26  
27  
28  
29  
30  
31  
32  
33  
34  
35  
36  
37  
38  
39  
40  
41  
42  
43  
44  
45  
46  
47  
48  
49  
50  
51  
52  
53  
54  
55  
56  
57  
58  
59  
60

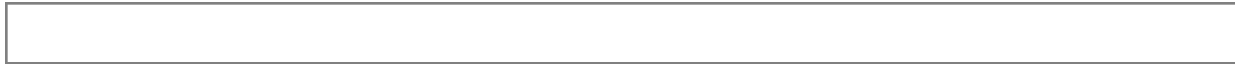

SCHOLARONE™  
Manuscripts

1  
2  
3 SCALE-UP II: Protocol for a Pragmatic Randomized Trial Examining Population Health Management  
4  
5 Interventions to Increase the Uptake of At-Home COVID-19 Testing in Community Health Centers  
6  
7  
8

9 Guilherme Del Fiol,<sup>1</sup> Brian Orleans,<sup>2</sup> Tatyana V. Kuzmenko,<sup>1</sup> Jonathan Chipman,<sup>3</sup> Tom Greene,<sup>3</sup> Anna  
10 Martinez,<sup>2</sup> Jennifer Wirth,<sup>2</sup> Ray Meads,<sup>2</sup> Kimberly A. Kaphingst,<sup>2,4</sup> Bryan Gibson,<sup>1</sup> Kensaku Kawamoto,<sup>1</sup>  
11 Andy J. King,<sup>2,4</sup> Tracey Siaperas,<sup>2,5</sup> Shlisa Hughes,<sup>5</sup> Alan Pruhs,<sup>5</sup> Courtney Pariera Dinkins,<sup>5</sup> Cho Y.  
12 Lam,<sup>2,3</sup> Joni H. Pierce,<sup>1</sup> Ryzen Benson,<sup>1</sup> Emerson P. Borsato,<sup>1</sup> Ryan C. Cornia,<sup>1</sup> Leticia Stevens,<sup>1</sup> Richard  
13 L. Bradshaw,<sup>1</sup> Chelsey R. Schlechter,<sup>2,3</sup> David W. Wetter<sup>2,3</sup>  
14  
15  
16  
17  
18  
19  
20  
21

22 <sup>1</sup> Department of Biomedical Informatics, University of Utah, Salt Lake City, Utah, USA

23 <sup>2</sup> Huntsman Cancer Institute, University of Utah, Salt Lake City, Utah, USA

24 <sup>3</sup> Department of Population Health Sciences, University of Utah, Salt Lake City, Utah, USA

25 <sup>4</sup> Department of Communication, University of Utah, Salt Lake City, Utah, USA

26 <sup>5</sup> Association for Utah Community Health, Salt Lake City, Utah, USA  
27  
28  
29  
30  
31  
32  
33  
34

35 **Corresponding author:** Guilherme Del Fiol, M.D., Ph.D.

36 Department of Biomedical Informatics

37 University of Utah

38 Email: [guilherme.delfiol@utah.edu](mailto:guilherme.delfiol@utah.edu)

39 Address: 421 Wakara Way, Suite 140

40 Salt Lake City, Utah 84018  
41  
42  
43  
44  
45  
46  
47  
48  
49

50 **Word Count:** 3,919  
51  
52  
53  
54  
55  
56  
57  
58  
59  
60

## ABSTRACT

**Introduction.** SCALE-UP II aims to investigate the effectiveness of population health management interventions using text messaging (TM), chatbots, and patient navigation (PN) in increasing the uptake of at-home COVID-19 testing among patients in historically marginalized communities, specifically those receiving care at safety net community health centers (CHCs).

**Methods and Analysis.** The trial is a multi-site, individually randomized pragmatic clinical trial. Eligible patients will be  $\geq 18$  years old with a primary care visit in the last three years at one of the participating CHCs. Patient demographic data will be obtained from CHC electronic health records. Patients will be randomized to one of two factorial designs based on smartphone ownership. Patients who self-report replying to a text message that they have a smartphone will be randomized in a 2x2x2 factorial fashion to receive (i) chatbot or TM; (ii) PN (yes or no); and (iii) repeated offers to interact with the interventions every 10 or 30 days. Participants who do not self-report as having a smartphone will be randomized in a 2x2 factorial fashion to receive (i) TM with or without PN; and (ii) repeated offers every 10 or 30 days. The interventions will be sent in English or Spanish, with an option to reply requesting free at-home COVID-19 test kits. The primary outcome will be the proportion of participants using at-home COVID-19 tests during a 90-day follow-up. The study will evaluate main effects and interactions among interventions, implementation outcomes, and predictors and moderators of study outcomes. Statistical analyses will include logistic regression, stratified subgroup analyses, and adjustment for stratification factors.

**Ethics and dissemination:** The study protocol was approved by the University of Utah Institutional Review Board. On completion, study data will be made available in compliance with National Institutes of Health data sharing policies.

**Trial registration:** Clinicaltrials.gov (NCT05533918 and NCT05533359).

**Keywords:** COVID-19, digital health, health equity, population health management

### Strengths and limitations of this study

- At-home COVID-19 testing is an important strategy to help reduce exposure and offer timely treatment to individuals at a higher risk for severe disease.
- The population health management interventions are scalable and will enable increasing the reach and uptake of at-home COVID-19 testing.
- Dissemination strategy modalities (i.e., voice and text cellphones) are nearly ubiquitous among adults in the United States, including among historically marginalized populations.
- Patient population will be drawn from community health centers in a single state.

## INTRODUCTION

Racial/ethnic minority, low socioeconomic status (SES), and rural populations suffer profound health inequities across a wide variety of conditions, including a higher rate of hospitalization and mortality due to COVID-19.<sup>1-4</sup> Similar inequities have been found across the US for vaccination rates between urban and rural,<sup>5</sup> high and low SES,<sup>6</sup> and White and non-White populations.<sup>7,8</sup> Low vaccination rates and withdrawal of protection measures leave historically marginalized populations at high risk for local outbreaks and more contagious variants.

Although public health agencies worldwide have declared the end of the pandemic, timely testing is still important to help reduce exposure and offer timely treatment to individuals at a higher risk for severe disease. However, historically marginalized communities lacked easy and convenient access to testing throughout the COVID-19 pandemic, especially after the closure of mass test sites nationwide.<sup>9,10</sup> Although several FDA-approved at-home tests are available, providing a convenient, quick and low-cost alternative for patients to test at home,<sup>11,12</sup> substantial disparities exist in the use of at-home COVID-19 testing. While the use of at-home COVID-19 testing has more than tripled between the Delta and Omicron outbreaks, use of at-home testing was more than twice as high among individuals identifying as White, having high SES, and having a postgraduate degree.<sup>13</sup> Thus, scalable approaches are needed to promote the uptake of at-home COVID-19 testing among individuals from historically marginalized communities.

Despite evidence of a digital divide between high resource healthcare systems and low resource community health centers (CHCs),<sup>14,15</sup> historically marginalized populations have almost universal access to technology such as cellphones, which provide opportunities for large scale population health management (PHM) interventions. Even in households with annual incomes less than \$30,000, 97% own a cellphone and 76% own a smartphone.<sup>16</sup> The SCALE-UP II trial will investigate three PHM interventions (text messaging [TM], automated chatbot, and patient navigation [PN]) to increase the reach and uptake of at-home COVID-19 testing among patients who receive care at CHCs.

## METHODS AND ANALYSIS

1  
2  
3 This protocol was developed using the Standard Protocol Items: Recommendations for  
4  
5  
6  
7  
8  
9  
10  
11  
12  
13  
14  
15  
16  
17  
18  
19  
20  
21  
22  
23  
24  
25  
26  
27  
28  
29  
30  
31  
32  
33  
34  
35  
36  
37  
38  
39  
40  
41  
42  
43  
44  
45  
46  
47  
48  
49  
50  
51  
52  
53  
54  
55  
56  
57  
58  
59  
60  
This protocol was developed using the Standard Protocol Items: Recommendations for  
Interventional Trials (SPIRIT).<sup>17</sup> The protocol was approved by the Institutional Review Board at the  
University of Utah on June 10, 2022 (IRB\_00150669). The trial was registered with Clinicaltrials.gov  
(NCT05533918 and NCT05533359) on September 9, 2022. Enrollment was planned to begin in  
December 2022 and data collection was planned to end in November 2023.

### **Patient and Public Involvement**

SCALE-UP II is conducted in partnership with the Association for Utah Community Health  
(AUCH), CHCs across Utah, the Utah Department of Health and Human Services (UDHHS), and the  
University of Utah. Our research-practice partnership uses a multi-pronged community engagement  
approach to (i) identify research questions, (ii) develop, adapt, and implement interventions, and (iii)  
inform dissemination plans.<sup>18,19</sup> The community engagement approach includes a weekly project meeting  
with AUCH, UDHHS, and the research team and quarterly Patient Advisory Committee (PAC; consisting  
of CHC patient representatives) and Study Advisory Committee (SAC; consisting of patients, CHC staff,  
UDHHS, and AUCH representatives) meetings. The research objectives of SCALE-UP II were identified  
in partnership with AUCH and UDHHS; both AUCH and UDHHS were interested in addressing the  
impact of COVID-19 among historically marginalized communities in Utah. Input from the PAC  
informed the design of the text messaging and chatbot interventions. Furthermore, TM and Chatbot  
scripts were developed following information gathered from community members in Utah.

### **Study Design**

SCALE-UP II is an individually randomized, multi-site, pragmatic clinical trial. The experimental  
design varies according to each patient's response to a text message asking if they have a smartphone.  
Participants who self-report that they have a smartphone will be randomized in a 2x2x2 factorial fashion  
to receive (i) chatbot or TM; (ii) PN (yes or no); and (iii) repeated offers to interact with the interventions  
every 10 or 30 days. Participants who do not respond to the introductory text message or who self-report  
as not having a smartphone will be randomized in a 2x2 factorial fashion to receive (i) TM with or  
without PN; and (ii) repeated offers every 10 or 30 days.



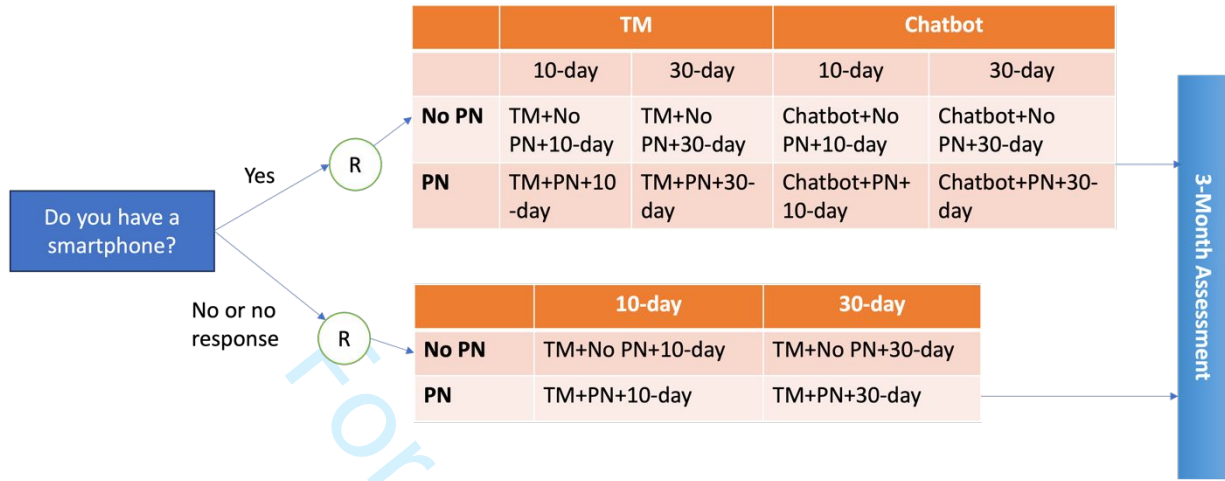

R=randomization; PN=patient navigation; TM=text messaging

Figure 1 – SCALE-UP II Trial Design

### Rationale for Study Design

The interventions in SCALE-UP II leverage (i) wide adoption of electronic health record (EHR) systems, even in low resource CHCs;<sup>20,21</sup> (ii) wide adoption of cellphones with at least voice and text capabilities;<sup>16</sup> and (iii) the low cost, efficiency, and simplicity of at-home COVID-19 tests.<sup>11,12</sup> Therefore, SCALE-UP II is designed to maximize reach with low-cost interventions to increase the uptake of COVID-19 testing in historically marginalized communities.

SCALE-UP II will enroll patients from Utah CHCs. These settings provide primary care to diverse, low SES populations, and provide an ideal setting to address COVID-19 because there is an established relationship and coordination of care, and ~80% of individuals see a primary care provider at least annually.<sup>22</sup> Three Utah CHC systems and their 12 primary care clinics will participate in SCALE-UP II. Demographics of SCALE-UP II CHC patients include: 51% Latino, 62%  $\leq 100\%$  federal poverty level, 69% uninsured, and receiving care in clinics where 17% are in rural/frontier areas.<sup>23</sup>

Since the chatbot requires a smartphone with connection to the internet, and about 25% of individuals with low SES and from rural areas do not have a smartphone,<sup>16</sup> SCALE-UP II will enroll patients in one of two factorial designs based on their smartphone ownership in order to maximize reach to the 96% of individuals who own at least a voice and text cellphone.

1  
2  
3 Patients may be reluctant to test due to hesitancy and numerous other barriers.<sup>24,25</sup> However,  
4 practical advice from patient navigators such as community health workers can help overcome hesitancy  
5 and engagement barriers such as logistics, transportation, and expense; of critical importance, providers  
6 welcome the use of these approaches with their patients.<sup>26-28</sup> Thus, in addition to the TM and chatbot  
7 interventions, SCALE-UP II will examine the added effect of offering access to patient navigation upon  
8 request through either intervention. Since patient navigation is a human-intensive intervention, examining  
9 the uptake of patient navigation when provided only upon request is critical for conserving resources in  
10 limited resource settings such as CHCs.  
11  
12  
13  
14  
15  
16  
17  
18

### 19 20 **Participants**

21  
22 The study inclusion criteria aim to enroll a broad range of individuals to maximize reach. Eligible  
23 patients will be those who (i) have been seen at one of the participating CHCs in the last three years, (ii)  
24 are 18 years and older, (iii) have a working cellphone listed in the CHC EHR, and (iv) indicate a language  
25 preference in the EHR of English or Spanish.  
26  
27  
28  
29

30  
31 The study will exclude participants who opt out upon receipt of the introductory message asking  
32 about smartphone ownership. Also, if more than one patient shares the same smartphone number in the  
33 EHR, only the patient with the most recent documented clinical encounter will be included.  
34  
35  
36

### 37 **Recruitment**

38  
39 As a pragmatic trial with interventions that offer minimal risk, the University of Utah IRB  
40 approved a waiver of consent for randomization and receipt of PHM interventions. Therefore, all  
41 participants who meet eligibility criteria will be automatically enrolled in the study. All three study points  
42 of contact (TM, chatbot, PN) will allow participants to opt-out through a simple reply at any time.  
43 Participants will be consented to complete the 3-month follow-up survey prior to survey completion using  
44 a consent cover letter.  
45  
46  
47  
48  
49  
50

### 51 **Randomization and Blinding**

52  
53 Participants who self-report having a smartphone will be randomized to one of eight study arms  
54 (Figure 1): (1) TM+10-day, (2) TM+30-day, (3) Chatbot+10-day, (4) Chatbot+30-day, (5) TM+PN+10-  
55  
56  
57  
58  
59

1  
2  
3 day, (6) TM+PN+30-day, (7) Chatbot+PN+10-day, or (8) Chatbot+PN+30-day. Participants who do not  
4 self-report to have a smartphone will be randomized to one of four study arms: (1) TM+10-day, (2)  
5 TM+30-day, (3) TM+PN+10-day, or (4) TM+PN+30-day. Participants will be randomized after receiving  
6 the introductory text message asking if they have access to a smartphone.  
7  
8  
9  
10

11 Randomization will be implemented by software and will utilize randomized permuted blocks to  
12 guard against any biases due to ordering of patients. Furthermore, the randomization will be stratified by  
13 CHC and urban/rural designation of the participant's zip code according to rural-urban commuting area  
14 (RUCA) codes.  
15  
16  
17  
18

19 The study is outcome assessor and investigator blinded. Patient navigators cannot be blinded to  
20 treatment assignment. Participants will be blinded to study participation.  
21  
22  
23

## 24 Study Interventions

25 Overall, all study interventions (i) are sent on behalf of the participant's clinic, (ii) offer the  
26 option to request at-home mailed COVID-19 test kits at no cost for use as needed, (iii) are provided  
27 automatically in English or Spanish based on the patient's preferred language in the CHC EHR, and (iv)  
28 provide an option for participants to opt-out at any time (see Figures 2 and 3).  
29  
30  
31  
32  
33  
34

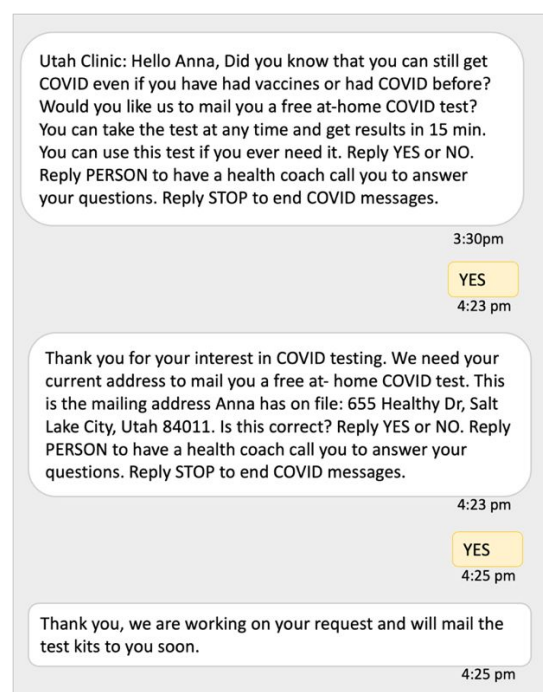

Figure 2 – Sample text message conversation offering COVID-19 at-home testing.

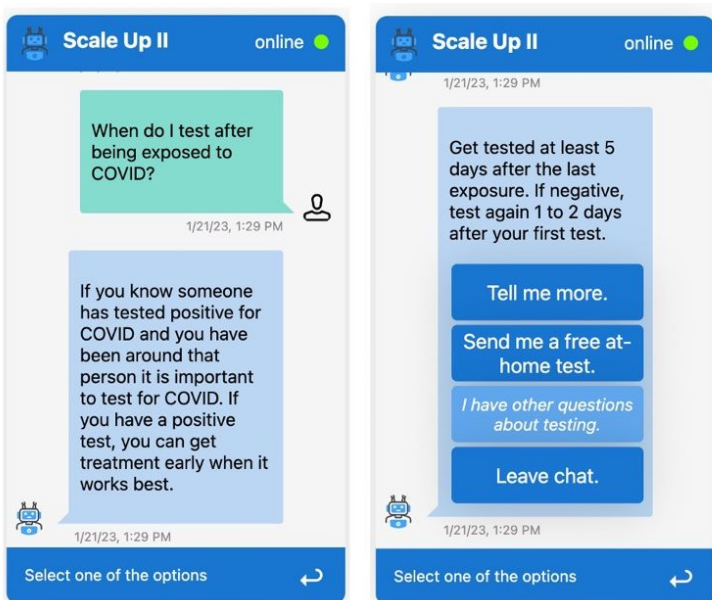

Figure 3 – Sequential screenshot of chatbot intervention showing a question being answered, followed by options to ask further questions, and request a COVID-19 test kit to be mailed to the patient's home.

Text Messaging (TM). Meta-analyses of text messaging interventions have found these approaches to be promising for improving compliance with healthy behaviors and preventive care, beneficial for multiple racial/ethnic groups, and inexpensive to deliver.<sup>29-34</sup> A US Department of Health and Human Services review concluded: *With the near-ubiquitous presence of cellphones and the rapid growth of smartphones, text messaging and other mHealth interventions can remove traditional geographic and economic barriers to access to health information and services. The higher rates of mobile phone ownership and use among Blacks and Hispanics, compared to Whites, are particularly noteworthy. These interventions have the potential to improve health knowledge, behaviors, and outcomes and, ultimately, to reduce disparities.*<sup>34</sup> Our own research has demonstrated that a simple, repeated offer to connect unmotivated, low-SES individuals with treatment resources resulted in 25% of individuals enrolling in tobacco cessation treatment.<sup>35</sup> Thus, repeated prompting offering access to COVID-19 testing via texts is an extremely convenient, low cost, scalable approach for increasing testing uptake.

TM will consist of bidirectional text messaging sent on behalf of the participant's clinic with a

1  
2  
3 response option for patients to request at-home mailed COVID-19 test kits at no cost (Figure 2).

4  
5 Participants randomized to TM+PN will also be able to reply requesting to speak with a patient navigator.

6  
7 Messages will be sent in English or Spanish based on the patient's language preference in the EHR.

8  
9 Chatbot. Chatbots are automated conversational agents designed to mimic human interaction.  
10  
11 Chatbots are increasingly popular in various health contexts as they can be easily accessed through  
12  
13 smartphones, tablets, laptops, or desktops. Chatbots have many advantages for patient engagement,  
14  
15 including providing scripted education interactively, chunking information into small segments that are  
16  
17 easier to process, and allowing for choice in the amount of information received. Chatbots are accessible  
18  
19 to the vast majority of U.S. adults. Even in households with annual incomes less than \$30,000, 76% own  
20  
21 a smartphone.<sup>16,36,37</sup> Delivery of health services through chatbots in research contexts has been  
22  
23 successfully tested in various health domains such as mental health, asthma, diabetes management, and  
24  
25 physical activity uptake.<sup>38</sup> While scripted chatbots have been widely used in the COVID-19 pandemic,  
26  
27 especially to evaluate patient's eligibility for testing and vaccination,<sup>39-44</sup> research is needed to examine  
28  
29 their benefits in addressing COVID-19 at-home testing. In addition, there is a lack of studies that  
30  
31 investigated the design and implementation of chatbots specifically for historically marginalized  
32  
33 populations.  
34  
35

36  
37 For SCALE-UP II, we designed a scripted chatbot (i.e., predefined conversation script, and a fixed set  
38  
39 of questions and scripted answers) that presents participants with a list of topics that address most  
40  
41 common knowledge gaps and hesitancy factors related to at-home COVID-19 testing (Figure 3). The  
42  
43 chatbot script was designed and guided by findings from a national survey and in-depth interviews with  
44  
45 participants in the targeted Utah population, both conducted by our team. The following topics are  
46  
47 covered: benefits of testing (even when already vaccinated or previously had COVID), when to test, test  
48  
49 accuracy, how to use a test, and what to do if a test is positive.  
50

51  
52 Patients in the chatbot condition will receive a text message on behalf of their clinic offering a  
53  
54 hyperlink to access the chatbot on the phone's web browser. At any point in the chatbot, participants will  
55  
56 be able to click a button to request an at-home test kit. Participants randomized to the PN condition can  
57  
58

1  
2  
3 also click PERSON to request to speak to a patient navigator. As in TM, the chatbot is offered both in  
4  
5 English and Spanish.  
6

7 Patient Navigation (PN). SCALE-UP II will use community health workers (CHWs) employed  
8  
9 by AUCH as patient navigators to address practical barriers, motivation, and hesitancy to COVID-19  
10  
11 testing. To assist navigators in working with patients, CHWs will be trained in an empirically-validated  
12  
13 behavior change approach (Motivation And Problem Solving; MAPS).<sup>45-50</sup> MAPS is a holistic, dynamic  
14  
15 approach to behavior change that integrates two empirically validated approaches (motivational  
16  
17 interviewing<sup>51,52</sup> and practical problem solving<sup>47,53,54</sup>) for helping patients engage in target behaviors.<sup>45-  
18  
19 47,49,50</sup> Importantly, MAPS addresses patients' social determinants of health, and provides practical advice  
20  
21 and connections to services whenever possible, including addressing testing concerns (e.g., worries about  
22  
23 repercussions of a positive test, infecting family members, quarantining, financial). MAPS has been  
24  
25 demonstrated to be effective in numerous randomized controlled trials with respect to increasing  
26  
27 enrollment in evidence-based interventions, as well as enhancing and maintaining behavior change.<sup>45-  
28  
29 47,49,50</sup>  
30  
31

32  
33 All SCALE-UP II navigators will receive ~20 hours of training, consistent with recommended  
34  
35 training for helpline specialists.<sup>55</sup> Participants randomized to the PN condition who request to speak with  
36  
37 a patient navigator will receive a phone call within 48 hours. Patient navigators will make three attempts  
38  
39 to contact a participant.  
40

### 41 **Study Roll-Out Schedule**

42  
43 To ensure that the interventions work properly with real patient data, a pilot study will be  
44  
45 conducted with a random sample of patients from one of the participating CHCs both for the TM and  
46  
47 Chatbot interventions.  
48

49  
50 For the remainder of patients, to address bottlenecks that depend on non-automated processes  
51  
52 (e.g., mailing of test kits, patient navigation), study participants will be exposed to interventions in one of  
53  
54 14 weekly batches according to a pre-defined schedule, in which a cohort with a new set of participants is  
55  
56 added to the study every week. Participants will be randomly allocated across the 14 batches, also  
57  
58  
59  
60

1  
2  
3 stratified by CHC and urban vs. rural.  
4

5 Every cycle starts by sending the introductory message to participants in the cohort (Day -2).  
6  
7 Participants will have two days to respond. After that, eligible participants will be randomized into one of  
8  
9 the two factorial designs depending on their response to the introductory message (Day 0). After  
10  
11 randomization, participants will receive messages offering access to at-home testing once every 10 versus  
12  
13 30 days for 7 weeks (Days 0, 10, 20, 30, 40, 50, and 60 vs. Days 0, 30, and 60).  
14  
15

### 16 **Outcome Assessment**

17  
18 The main study outcomes are described below. Table 1 provides a complete list including the  
19  
20 primary, secondary outcomes, and implementation outcomes, as well as predictors and moderators of  
21  
22 study outcomes.  
23

24 Primary Outcomes and Hypotheses. The primary outcome is *Testing*; the proportion of study  
25  
26 participants who use an at-home COVID-19 test during the course of 90-day study follow-up as defined  
27  
28 below. For all patients, regardless of self-report of smartphone ownership, the primary hypotheses are  
29  
30 main effects for PN (PN > No PN), main effects for message frequency (10-day > 30-day), and that  
31  
32 TM+PN will lead to higher *Testing* than TM. These hypotheses will be tested at an alpha of .0167,  
33  
34 adjusted for multiple comparisons using the Bonferroni method. Because we anticipate a low sample size  
35  
36 of smartphone self-reporters to be adequately powered, we consider Chatbot-related hypotheses as  
37  
38 secondary. These include the hypothesis that Chatbot will lead to a higher *Testing* than TM and that  
39  
40 Chatbot+PN will lead to a higher *Testing* than Chatbot without PN. These hypotheses will be tested at  
41  
42 alpha of .05.  
43  
44

45 Secondary and Implementation Outcomes. We will evaluate Chatbot+PN versus Chatbot,  
46  
47 interaction effects, and indicators of TM, Chatbot, and PN implementation among participants.  
48  
49 Implementation outcomes measure the extent of the delivery and adaptation of intervention components,  
50  
51 including *Reach-Engage Testing* (proportion of participants who are offered at-home testing and reply to  
52  
53 the message or launch the Chatbot), *Reach-Accept Testing* (proportion of participants who are offered at-  
54  
55  
56  
57  
58  
59  
60

home testing and reply accepting or select “Send me a test” on the Chatbot), *PN-Request* (proportion of participants in the PN condition who request patient navigation), *PN-Engage* (proportion of participants in the PN condition who talk to a patient navigator), and *Opt-Out* (proportion of participants who opt-out). We will analyze chatbot usage patterns (e.g., time using chatbot, topics visited) as listed in Table 1.

Predictors and Moderators of Study Outcomes. We will assess predictors and moderators including demographics, vaccination status, and Tier 1 Common Data Elements (CDEs) used by the Rapid Acceleration of Diagnostics-Underserved Populations (RADx-UP) program of the U.S. National Institutes of Health (NIH).<sup>56</sup>

Study Assessments. The primary outcome *Testing* will be collected through two methods from patients who requested a test kit: (i) a brief text message sent 90 days after the first exposure to interventions asking if they used the mailed COVID-19 test (patients are asked to reply with a single YES or NO response to the text message); and (ii) a survey sent to participants 7 days after the last exposure to study interventions (Day 97). Secondary outcomes *Reach-Engage Testing*, *Reach-Accept Testing*, *PN-Request*, *PN-Engage*, and *Opt-Out* will be obtained from computer system logs. The survey will also collect Tier 1 CDEs. To complete the survey, participants will be invited via mail and text message to complete a survey. Non-responders will also be called via phone to complete an interviewer-administered survey. Vaccination status will be obtained from the Utah State Immunization Information System (USIIS). Other predictors and moderators of study outcomes will be collected from EHR data (e.g., demographics) and online surveys (i.e., Tier 1 CDEs).

**Table 1 - Study Assessments.**

| Assessment                | Baseline | During exposure to interventions | Day 90 Follow-Up (via text msg) | Day 97 Follow-Up (via survey) | Description                                                          |
|---------------------------|----------|----------------------------------|---------------------------------|-------------------------------|----------------------------------------------------------------------|
| Demographics              | X        |                                  |                                 | X                             | Age sex, race, ethnicity, preferred language, insurance status, etc. |
| Testing (primary outcome) |          |                                  | X                               | X                             | Proportion of study                                                  |



| Assessment                             | Baseline | During exposure to interventions | Day 90 Follow-Up (via text msg) | Day 97 Follow-Up (via survey) | Description                                                                                                                                 |
|----------------------------------------|----------|----------------------------------|---------------------------------|-------------------------------|---------------------------------------------------------------------------------------------------------------------------------------------|
|                                        |          |                                  |                                 |                               | participants who use an at-home COVID-19 test during the course of the study                                                                |
| Number of tests used                   |          |                                  | X                               | X                             | Self-reported number of tests used by each study participant who requested a test.                                                          |
| Vaccination status                     | X        |                                  |                                 | X                             | COVID-19 vaccination status according to state immunization registry                                                                        |
| NIH RADx-UP CDE data elements (Tier 1) |          |                                  |                                 | X                             | Comprehensive questionnaire (234 items) including demographics, COVID testing, symptoms, health status, social determinants of health, etc. |
| <b>Implementation Outcomes</b>         |          |                                  |                                 |                               |                                                                                                                                             |
| Reach-Engage Testing                   |          | X                                |                                 |                               | Proportion of participants who are offered at-home testing and reply to the message or launch the chatbot                                   |
| Reach-Engage Frequency                 |          | X                                |                                 |                               | Number of times a participant replied to a message offering at-home testing or launched the chatbot                                         |
| Reach-Accept Testing                   |          | X                                |                                 |                               | Proportion of participants who are offered at-home testing and reply accepting                                                              |
| Reach-Engage Frequency                 |          | X                                |                                 |                               | Number of times a participant replied to a message/chatbot requesting at-home testing                                                       |
| PN-Request                             |          | X                                |                                 |                               | Proportion of participants in the PN condition who request patient navigation                                                               |
| PN-Request Frequency                   |          | X                                |                                 |                               | Number of times a participant requested to speak with a patient navigator                                                                   |

| Assessment                | Baseline | During exposure to interventions | Day 90 Follow-Up (via text msg) | Day 97 Follow-Up (via survey) | Description                                                                                                                                                 |
|---------------------------|----------|----------------------------------|---------------------------------|-------------------------------|-------------------------------------------------------------------------------------------------------------------------------------------------------------|
| PN-Engage                 |          | X                                |                                 |                               | Proportion of participants in the PN condition who talk to a patient navigator                                                                              |
| PN-Engage Frequency       |          | X                                |                                 |                               | Number of times a participant spoke with a patient navigator                                                                                                |
| Opt-Out                   |          | X                                |                                 |                               | Proportion of participants who opted-out                                                                                                                    |
| <b>Chatbot use</b>        |          |                                  |                                 |                               |                                                                                                                                                             |
| Chatbot session length    |          | X                                |                                 |                               | Amount of time spent using the chatbot in a session                                                                                                         |
| Chatbot timeout           |          | X                                |                                 |                               | Proportion of chatbot sessions that timed out without reaching an endpoint (e.g., close chatbot window, request test, request to talk to patient navigator) |
| Chatbot actions           |          | X                                |                                 |                               | Number of chatbot topics clicked per session                                                                                                                |
| Chatbot test request only |          | X                                |                                 |                               | Proportion of chatbot session in which the only action was requesting a test                                                                                |
| Chatbot coverage          |          | X                                |                                 |                               | Proportion of chatbot contents that are accessed per session                                                                                                |
| Chatbot topics            |          | X                                |                                 |                               | Proportion of sessions in which a specific chatbot topic is accessed                                                                                        |

Statistical Analysis. The main effects of each intervention will be evaluated using a logistic regression model by regressing 90-day testing upon each of the three main effects: Chatbot (vs. TM) with an indicator for self-reporting to have a smartphone, PN (vs. no PN), and outreach frequency (10 vs. 30 days). We will preliminarily include the pairwise interactions of the main effects, and the three-way interaction to assess for any synergistic and/or antagonistic effect modifications across interventions and will include any statistically significant effect modifications (i.e., interactions) in the primary analysis

1  
2  
3 model. The model will adjust for whether the patient self-reported having a smartphone. Estimates and  
4  
5 95% confidence intervals will be reported for each main effect and interaction effect. If an interaction  
6  
7 term was included for having evidence of an effect modification, we will report the main effects  
8  
9 separately for each level of the effect modifying intervention. The model will be run on all participants to  
10  
11 evaluate the primary hypotheses, each tested at alpha of .0167, and it will be applied to the smartphone  
12  
13 participants to evaluate the secondary hypotheses.  
14

15  
16 Among the smartphone subgroup, we will fit the primary analysis model to evaluate all other  
17  
18 main effects as a secondary analysis. We will also test the added effect of PN among those randomized to  
19  
20 receive Chatbot. Among the remaining patients, we will regress 90-day testing upon PN (yes vs no) and  
21  
22 outreach frequency (10 vs 30 days). We will include an interaction if a preliminary model provides  
23  
24 evidence of an effect modification. Side-by-side, we will present the estimated effects across all patients  
25  
26 and by smartphone ownership subgroup.  
27

28  
29 Handling Missing Data. The primary analysis will assume missing outcomes and covariates are  
30  
31 missing at random (MAR). Under this assumption, observed covariates can be used to explain the  
32  
33 missingness mechanism. When conditioning on observed covariates, the distribution of outcomes is  
34  
35 assumed to be similar among responders and non-responders. With this framework, we will omit missing  
36  
37 outcomes,<sup>57</sup> multiply impute missing covariates using a fully conditional specified model,<sup>58</sup> and account  
38  
39 for the multiple imputations in analysis.<sup>59</sup> While MAR is considered a reasonable starting point  
40  
41 assumption for missing data, it is plausible that responders and non-responders have different outcomes  
42  
43 beyond what can be adjusted by covariates (i.e., missing not at random; MNAR). We will use pattern  
44  
45 mixture models as a sensitivity analysis to assess the robustness of conclusions under the MAR  
46  
47 assumption.<sup>60</sup>  
48

49  
50 Sample Size Justification. Power for SCALE-UP II was evaluated for a target enrollment of  
51  
52 42,000 adults aged 18 year and older who receive care at the three participating CHCs, have a valid  
53  
54 cellphone recorded in the EHR, and have English or Spanish as their preferred language in the EHR.  
55  
56 Among those patients, we anticipate fewer than 10% opt outs. We assume 75% will have a smartphone  
57  
58  
59

1  
2  
3 and 10% to self-report as having a smartphone. Among these patients with a self-reported smartphone, we  
4 anticipate ~375 patients in each of the eight study arms. Among patients who do not self-report as having  
5 a smartphone, we expect ~8,750 patients in each of the four arms.  
6  
7

8  
9 We hypothesize that TM with no PN and a 30-day outreach will have a 5% at-home testing rate  
10 and that PN, Chatbot, and 10-day outreach frequency will increase the testing rate by 5% each without a  
11 synergistic effect. We hypothesize the at-home testing rate to be 5% less when outreach occurs every 30  
12 days. We anticipate a  $\geq 40\%$  response rate for the primary outcome. Under these assumptions, and with  
13 alpha adjusted to .0167, we are essentially fully powered to test the primary hypotheses. If the response  
14 rate is 20%, we are at least 85% powered to test these effects. In secondary analyses, with alpha of .05  
15 and a 40% response rate, we are 75% powered to detect the Chatbot main effect of and 68% powered to  
16 detect the added effect of PN.  
17  
18  
19  
20  
21  
22  
23  
24  
25

## 26 **DISCUSSION**

27  
28 Individuals from historically marginalized communities have suffered substantial health  
29 inequities throughout the COVID-19 pandemic, not only in terms of outcomes but also vaccination rates  
30 and access to testing.<sup>1-8,61,62</sup> PHM approaches leveraging widely adopted EHR systems and technology  
31 such as cellphones provide excellent opportunities to deliver scalable interventions to improve health  
32 equity. The SCALE-UP II trial aims to examine scalable and sustainable PHM interventions to increase  
33 the uptake of at-home COVID-19 testing among individuals who receive care from low resource CHCs.  
34 Strengths include a pragmatic trial with broad inclusion criteria leveraging existing EHR data; highly  
35 scalable automated interventions; and a novel design that compares two digital patient engagement  
36 approaches (TM and Chatbot), examines the added effect of a human-augmented intervention (patient  
37 navigation) over digital interventions, and compares two frequencies (every 10 days or 30 days) of  
38 repeated offers to receive COVID-19 testing.  
39  
40  
41  
42  
43  
44  
45  
46  
47  
48  
49  
50

51 Even though public health agencies worldwide have declared the end of the COVID-19  
52 pandemic, COVID-19 testing is still critical to help reduce exposure and to identify individuals who can  
53 benefit from treatment. In addition, approaches are needed to support public health preparedness for  
54  
55  
56  
57  
58  
59  
60

1  
2  
3 future pandemics and outbreaks. The proposed interventions in SCALE-UP II leverage resources that are  
4 currently available at CHCs and therefore can be sustained in the long term.  
5  
6

### 7 **Limitations**

8  
9 The study design has several limitations. First, a potentially low response rate to the introductory  
10 message asking about smartphone ownership could lead to a small sample size and randomization of only  
11 motivated individuals to the chatbot condition. We considered randomizing all participants to Chatbot vs.  
12 TM, but patients who do not have a smartphone (estimated as 25% of the CHC patient population) and  
13 are randomized to the chatbot condition would not be able to use the chatbot, compromising study reach.  
14  
15 Second, the study relies on self-report for the primary outcome (*Testing*). To maximize response rates, we  
16 use two approaches to collect the primary outcome: a quick question via text messaging after exposure to  
17 study interventions and a survey at the end of the study. Last, the study will be conducted after the peak of  
18 the pandemic, when participants may be less motivated to learn about and receive COVID-19 testing.  
19  
20 Also, individuals have been overexposed to information about COVID-19 from multiple sources and may  
21 have already formed their opinions about COVID-19 and COVID-19 testing. Therefore, it is possible that  
22 study findings may not generalize to the context of new onset of a pandemic or outbreak.  
23  
24  
25  
26  
27  
28  
29  
30  
31  
32  
33  
34  
35  
36

37 **Funding Statement.** This work was supported by the National Institute on Minority Health and Health  
38 Disparities (NIMHHD) of the U.S. National Institutes of Health (NIH) grant number 5U01MD017421.  
39  
40

41 **Competing interests statement.** The authors declare no competing interests.  
42  
43  
44

### 45 **REFERENCES**

- 46  
47  
48 1. Adhikari S, Pantaleo NP, Feldman JM, Ogedegbe O, Thorpe L, Troxel AB. Assessment of  
49 Community-Level Disparities in Coronavirus Disease 2019 (COVID-19) Infections and Deaths in Large US  
50 Metropolitan Areas. *JAMA Network Open*. 2020;3(7):e2016938-e2016938.  
51 doi:10.1001/jamanetworkopen.2020.16938  
52 2. Millett GA, Jones AT, Benkeser D, et al. Assessing differential impacts of COVID-19 on black  
53 communities. *Ann Epidemiol*. Jul 2020;47:37-44. doi:10.1016/j.annepidem.2020.05.003  
54 3. Webb Hooper M, Nápoles AM, Pérez-Stable EJ. COVID-19 and Racial/Ethnic Disparities. *JAMA*.  
55 Jun 23 2020;323(24):2466-2467. doi:10.1001/jama.2020.8598  
56  
57  
58  
59  
60

4. Romano SD, Blackstock AJ, Taylor EV, et al. Trends in Racial and Ethnic Disparities in COVID-19 Hospitalizations, by Region - United States, March-December 2020. *MMWR Morb Mortal Wkly Rep*. Apr 16 2021;70(15):560-565. doi:10.15585/mmwr.mm7015e2
5. Murthy BP, Sterrett N, Weller D, et al. Disparities in COVID-19 vaccination coverage between urban and rural counties—United States, December 14, 2020–April 10, 2021. *Morbidity and Mortality Weekly Report*. 2021;70(20):759.
6. Barry V, Dasgupta S, Weller DL, et al. Patterns in COVID-19 vaccination coverage, by social vulnerability and urbanicity—United States, December 14, 2020–May 1, 2021. *Morbidity and Mortality Weekly Report*. 2021;70(22):818.
7. Reitsma MB, Goldhaber-Fiebert JD, Salomon JA. Quantifying and Benchmarking Disparities in COVID-19 Vaccination Rates by Race and Ethnicity. *JAMA Network Open*. 2021;4(10):e2130343-e2130343. doi:10.1001/jamanetworkopen.2021.30343
8. Williams AM, Clayton HB, Singleton JA. Racial and ethnic disparities in COVID-19 vaccination coverage: the contribution of socioeconomic and demographic factors. *American journal of preventive medicine*. 2022;62(4):473-482.
9. ABC4. COVID-19 testing site at Maverik Center closing. Retrieved from ABC4.com. Accessed 06/29/2021, <https://www.abc4.com/coronavirus/covid-19-testing-site-at-maverik-center-closing/>
10. Miami Herald. Florida-run COVID testing sites closing at the end of May. Where can you go next? Retrieved from Miami Herald website. Accessed 06/29/2021, <https://www.miamiherald.com/news/coronavirus/article251528343.html>
11. Mercer TR, Salit M. Testing at scale during the COVID-19 pandemic. *Nat Rev Genet*. Jul 2021;22(7):415-426. doi:10.1038/s41576-021-00360-w
12. Rubin R. COVID-19 Testing Moves Out of the Clinic and Into the Home. *JAMA*. Oct 12 2021;326(14):1362-1364. doi:10.1001/jama.2021.15679
13. Rader B, Gertz A, Iuliano AD, et al. Use of At-Home COVID-19 Tests - United States, August 23, 2021-March 12, 2022. *MMWR Morb Mortal Wkly Rep*. Apr 1 2022;71(13):489-494. doi:10.15585/mmwr.mm7113e1
14. Adler-Milstein J, Holmgren AJ, Kralovec P, Worzala C, Searcy T, Patel V. Electronic health record adoption in US hospitals: the emergence of a digital “advanced use” divide. *Journal of the American Medical Informatics Association*. 2017;24(6):1142-1148. doi:10.1093/jamia/ocx080
15. Kruse CS, Kristof C, Jones B, Mitchell E, Martinez A. Barriers to electronic health record adoption: a systematic literature review. *Journal of Medical Systems*. 2016/10/06 2016;40(12):252. doi:10.1007/s10916-016-0628-9
16. PEW Research Center. *Mobile Fact Sheet*. Retrieved from: <https://www.pewresearch.org/internet/fact-sheet/mobile/>  
<https://www.pewresearch.org/internet/fact-sheet/mobile/>
17. Chan AW, Tetzlaff JM, Altman DG, et al. SPIRIT 2013 statement: defining standard protocol items for clinical trials. *Annals of internal medicine*. Feb 5 2013;158(3):200-7. doi:10.7326/0003-4819-158-3-201302050-00583
18. Schlechter CR, Del Fiol G, Lam CY, et al. Application of community - engaged dissemination and implementation science to improve health equity. *Prev Med Rep*. Dec 2021;24:101620. doi:10.1016/j.pmedr.2021.101620
19. Schlechter CR, Reese TJ, Wirth J, et al. Rapid-cycle designs to adapt interventions for COVID-19 in safety-net healthcare systems. *Translational Behavioral Medicine*. 2023;doi:10.1093/tbm/ibac101
20. Henry J, Pylypchuk Y, Searcy T, Patel V. Adoption of electronic health record systems among US non-federal acute care hospitals: 2008-2015. *ONC Data Brief*. 2016;35:1-9.

21. (ONC) T0otNCfHI. Office-based Physician Electronic Health Record Adoption. Updated 08/06/2021. Accessed 11/13/2021, 2021. <https://www.healthit.gov/data/quickstats/office-based-physician-electronic-health-record-adoption>
22. National Center for Health Statistics. Ambulatory care use and physician office visit. Accessed 03/07/2020, <https://www.cdc.gov/nchs/fastats/physician-visits.htm>
23. UDOH. Behavioral Risk Factor Surveillance System (BRFSS) data on obesity. Retrieved from Utah Department of Health, Center for Health Data and Informatics, Indicator-Based Information System for Public Health website. Accessed 05/10/2020, <http://ibis.health.utah.gov/>
24. Ali MK, Bullard KM, Imperatore G, et al. Reach and use of diabetes prevention services in the United States, 2016–2017. *JAMA network open*. 2019;2(5):e193160-e193160.
25. Ariel-Donges AH, Gordon EL, Dixon BN, et al. Rural/urban disparities in access to the National Diabetes Prevention Program. *Translational behavioral medicine*. 2019;
26. McBrien KA, Ivers N, Barnieh L, et al. Patient navigators for people with chronic disease: A systematic review. *PloS one*. 2018;13(2):e0191980-e0191980. doi:10.1371/journal.pone.0191980
27. Peart A, Lewis V, Brown T, Russell G. Patient navigators facilitating access to primary care: a scoping review. *BMJ Open*. 2018;8(3):e019252. doi:10.1136/bmjopen-2017-019252
28. Valaitis RK, Carter N, Lam A, Nicholl J, Feather J, Cleghorn L. Implementation and maintenance of patient navigation programs linking primary care with community-based health and social services: a scoping literature review. *BMC health services research*. 2017/02/06 2017;17(1):116. doi:10.1186/s12913-017-2046-1
29. Cole-Lewis H, Kershaw T. Text messaging as a tool for behavior change in disease prevention and management. *Epidemiologic Reviews*. 2010:mxq004.
30. Gurol-Urganci I, de Jongh T, Vodopivec-Jamsek V, Atun R, Car J. Mobile phone messaging reminders for attendance at healthcare appointments. *Cochrane Database of Systematic Reviews*. 2013;(12)doi:10.1002/14651858.CD007458.pub3
31. Head KJ, Noar SM, Iannarino NT, Harrington NG. Efficacy of text messaging-based interventions for health promotion: a meta-analysis. *Social science & medicine (1982)*. 2013;97:41-48.
32. Schwebel FJ, Larimer ME. Using text message reminders in health care services: A narrative literature review. *Internet Interventions*. 2018/09/01/ 2018;13:82-104. doi:<https://doi.org/10.1016/j.invent.2018.06.002>
33. Vodopivec-Jamsek V, de Jongh T, Gurol-Urganci I, Atun R, Car J. Mobile phone messaging for preventive health care. *The Cochrane Library*. 2012;
34. USDHHS. *Using Health Text Messages To Improve Consumer Health Knowledge, Behaviors, And Outcomes: An Environmental Scan*. 2014.
35. Wetter DW. How can we help more smokers engage in evidence-based treatment? presented at: Annual Conference of the Utah Cancer Action Network; 2017; Salt Lake City, UT.
36. Anderson M. *Mobile technology and home broadband*. Retrieved from <https://www.pewresearch.org/internet/2019/06/13/mobile-technology-and-home-broadband-2019/>. <https://www.pewresearch.org/internet/2019/06/13/mobile-technology-and-home-broadband-2019/>
37. PEW Research Center. *Internet/Broadband fact sheet*. Retrieved from <https://www.pewresearch.org/internet/fact-sheet/internet-broadband/>.
38. Kocaballi AB, Berkovsky S, Quiroz JC, et al. The Personalization of Conversational Agents in Health Care: Systematic Review. *J Med Internet Res*. 2019/11/7 2019;21(11):e15360. doi:10.2196/15360
39. Judson TJ, Odisho AY, Neinstein AB, et al. Rapid design and implementation of an integrated patient self-triage and self-scheduling tool for COVID-19. *Journal of the American Medical Informatics Association*. 2020;27(6):860-866. doi:10.1093/jamia/ocaa051

- 1  
2  
3 40. Judson TJ, Odisho AY, Young JJ, et al. Implementation of a digital chatbot to screen health  
4 system employees during the COVID-19 pandemic. *Journal of the American Medical Informatics*  
5 *Association*. 2020;27(9):1450-1455. doi:10.1093/jamia/ocaa130  
6  
7 41. McKillop M, South BR, Preininger A, Mason M, Jackson GP. Leveraging conversational  
8 technology to answer common COVID-19 questions. *Journal of the American Medical Informatics*  
9 *Association*. 2021;28(4):850-855. doi:10.1093/jamia/ocaa316  
10  
11 42. Dennis AR, Kim A, Rahimi M, Ayabakan S. User reactions to COVID-19 screening chatbots from  
12 reputable providers. *Journal of the American Medical Informatics Association*. 2020;27(11):1727-1731.  
13 doi:10.1093/jamia/ocaa167  
14  
15 43. Ford D, Harvey JB, McElligott J, et al. Leveraging health system telehealth and informatics  
16 infrastructure to create a continuum of services for COVID-19 screening, testing, and treatment. *Journal*  
17 *of the American Medical Informatics Association*. 2020;27(12):1871-1877. doi:10.1093/jamia/ocaa157  
18  
19 44. Martin A, Nateqi J, Gruarin S, et al. An artificial intelligence-based first-line defence against  
20 COVID-19: digitally screening citizens for risks via a chatbot. *Scientific Reports*. 2020/11/04  
21 2020;10(1):19012. doi:10.1038/s41598-020-75912-x  
22  
23 45. Correa-Fernández V, Díaz-Toro EC, Reitzel LR, et al. Combined treatment for at-risk drinking and  
24 smoking cessation among Puerto Ricans: A randomized clinical trial. *Addictive Behaviors*. 2017;65:185-  
25 192.  
26  
27 46. McClure JB, Westbrook E, Curry SJ, Wetter DW. Proactive, motivationally enhanced smoking  
28 cessation counseling among women with elevated cervical cancer risk. *Nicotine & Tobacco Research*.  
29 Dec 2005;7(6):881-9.  
30  
31 47. Reitzel LR, Vidrine JI, Businelle MS, et al. Preventing postpartum smoking relapse among diverse  
32 low-income women: a randomized clinical trial. *Nicotine Tob Res*. Apr 2010;12(4):326-35. doi:ntq001  
33 [pii]  
34 10.1093/ntr/ntq001  
35  
36 48. Vidrine JI, Reitzel LR, Figueroa P, et al. Motivation And Problem Solving (MAPS): Motivationally-  
37 based skills training for treating substance use. *Cogn Behav Pract*. 2013;20(4):501-516.  
38  
39 49. Vinci C, Lam CY, Schlechter CR, Shono Y, Vidrine JI, Wetter DW. Increasing treatment  
40 engagement among smokers who are not motivated to quit: A randomized clinical trial. In preparation;  
41  
42 50. Wetter DW, Mazas C, Daza P, et al. Reaching and treating Spanish-speaking smokers through the  
43 National Cancer Institute's Cancer Information Service. A randomized controlled trial. *Cancer*. Jan 15  
44 2007;109(2 Suppl):406-13.  
45  
46 51. Miller WR, Rollnick S. *Motivational Interviewing: Preparing People to Change Addictive Behavior*.  
47 The Guildford Press; 1991.  
48  
49 52. Miller WR, Rollnick S. *Motivational Interviewing (2nd edition)*. The Guilford Press; 2002.  
50  
51 53. Marlatt G, Donovan D, eds. *Relapse prevention: Maintenance Strategies in the Treatment of*  
52 *Addictive Behaviors (2nd edition)*. Guilford Press; 2005.  
53  
54 54. Witkiewitz K, Marlatt GA. Relapse prevention for alcohol and drug problems: That was Zen, this  
55 is Tao. *American Psychologist*. May-Jun 2004;59(4):224-35.  
56  
57 55. CDC. *Telephone Quitlines: A Resource for Development, Implementation, and Evaluation*. 2004.  
58 September  
59  
60 56. Rubinstein YR, McInnes P. NIH/NCATS/GRDR® Common Data Elements: A leading force for  
standardized data collection. *Contemp Clin Trials*. May 2015;42:78-80. doi:10.1016/j.cct.2015.03.003  
57  
58 57. Little RJ, Rubin DB. *Statistical analysis with missing data*. vol 793. John Wiley & Sons; 2019.  
59  
60 58. van Buuren S. Multiple imputation of discrete and continuous data by fully conditional  
specification. *Stat Methods Med Res*. Jun 2007;16(3):219-42. doi:10.1177/0962280206074463



- 1  
2  
3 59. Toutenburg H, Rubin, DB: Multiple imputation for nonresponse in surveys: Wiley, New York  
4 1987. XXIX+ 258 pp. Springer; 1990.  
5  
6 60. Cro S, Morris TP, Kenward MG, Carpenter JR. Sensitivity analysis for clinical trials with missing  
7 continuous outcome data using controlled multiple imputation: A practical guide. *Stat Med*. Sep 20  
8 2020;39(21):2815-2842. doi:10.1002/sim.8569  
9  
10 61. Khullar D, Zhang Y, Zang C, et al. Racial/Ethnic Disparities in Post-acute Sequelae of SARS-CoV-2  
11 Infection in New York: an EHR-Based Cohort Study from the RECOVER Program. *J Gen Intern Med*. Apr  
12 2023;38(5):1127-1136. doi:10.1007/s11606-022-07997-1  
13  
14 62. Pfaff ER, Madlock-Brown C, Baratta JM, et al. Coding long COVID: characterizing a new disease  
15 through an ICD-10 lens. *BMC Med*. Feb 16 2023;21(1):58. doi:10.1186/s12916-023-02737-6  
16  
17  
18  
19  
20  
21  
22  
23  
24  
25  
26  
27  
28  
29  
30  
31  
32  
33  
34  
35  
36  
37  
38  
39  
40  
41  
42  
43  
44  
45  
46  
47  
48  
49  
50  
51  
52  
53  
54  
55  
56  
57  
58  
59  
60

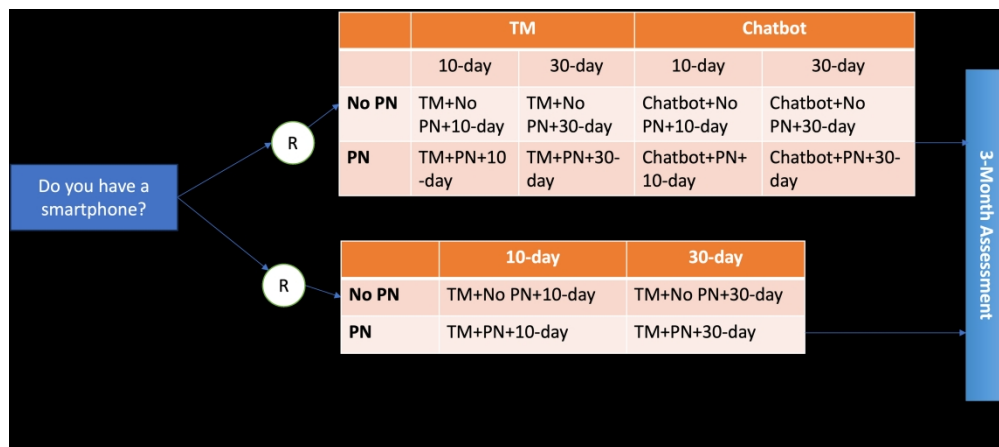

Figure 1 – SCALE-UP II Trial Design

327x144mm (300 x 300 DPI)

1  
2  
3  
4  
5  
6  
7  
8  
9  
10  
11  
12  
13  
14  
15  
16  
17  
18  
19  
20  
21  
22  
23  
24  
25  
26  
27  
28  
29  
30  
31  
32  
33  
34  
35  
36  
37  
38  
39  
40  
41  
42  
43  
44  
45  
46  
47  
48  
49  
50  
51  
52  
53  
54  
55  
56  
57  
58  
59  
60

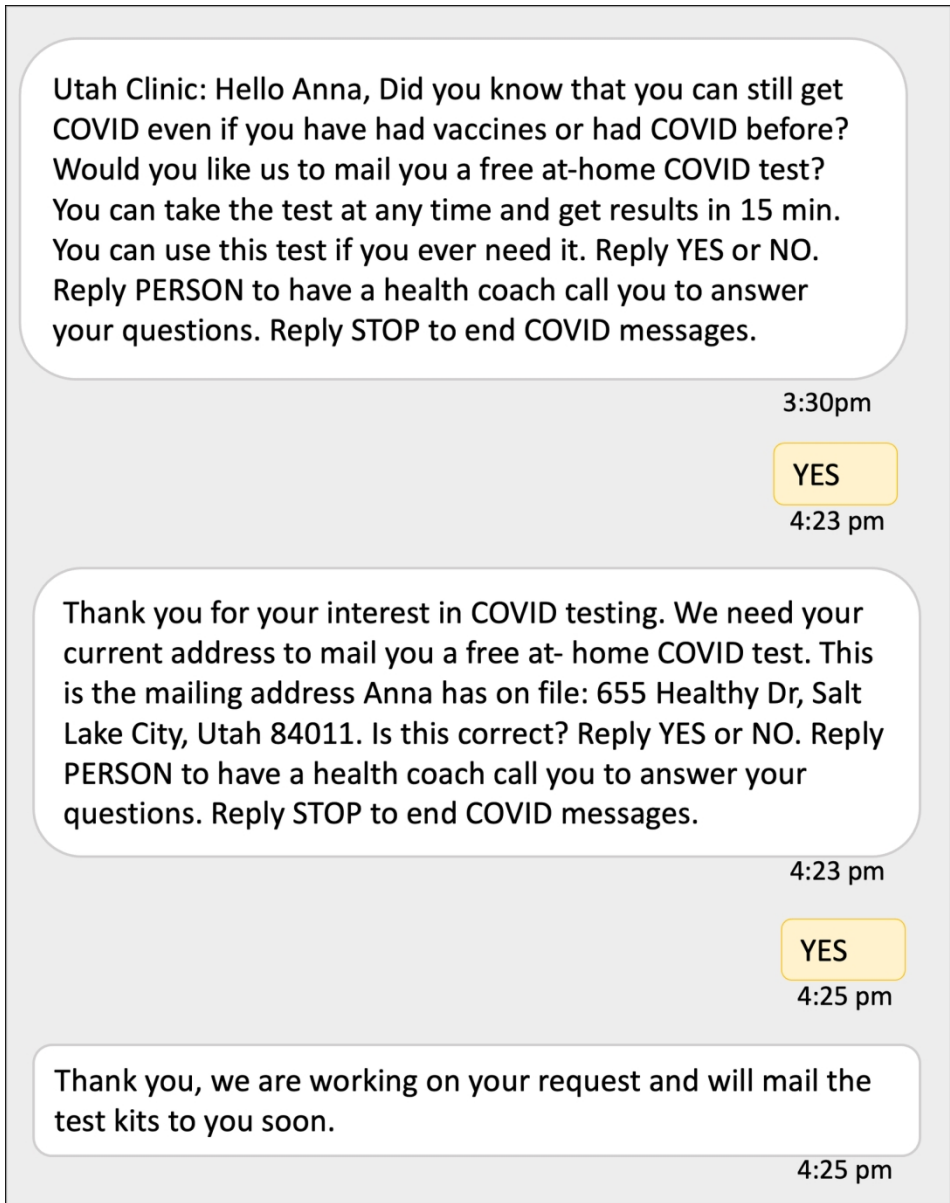

Figure 2 – Sample text message conversation offering COVID-19 at-home testing.

149x188mm (300 x 300 DPI)

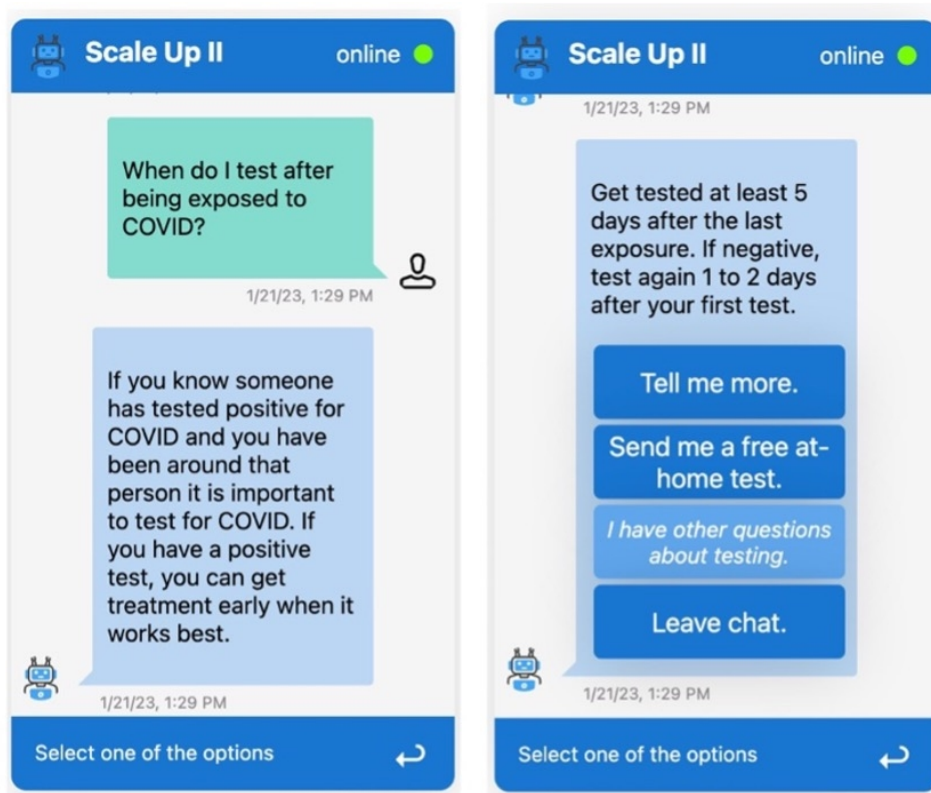

Figure 3 – Sequential screenshot of chatbot intervention showing a question being answered, followed by options to ask further questions, and request a COVID-19 test kit to be mailed to the patient's home.

101x81mm (220 x 220 DPI)

# Reporting checklist for protocol of a clinical trial.

Based on the SPIRIT guidelines.

## Instructions to authors

Complete this checklist by entering the page numbers from your manuscript where readers will find each of the items listed below.

Your article may not currently address all the items on the checklist. Please modify your text to include the missing information. If you are certain that an item does not apply, please write "n/a" and provide a short explanation.

Upload your completed checklist as an extra file when you submit to a journal.

In your methods section, say that you used the SPIRIT reporting guidelines, and cite them as:

Chan A-W, Tetzlaff JM, Gøtzsche PC, Altman DG, Mann H, Berlin J, Dickersin K, Hróbjartsson A, Schulz KF, Parulekar WR, Krleža-Jerić K, Laupacis A, Moher D. SPIRIT 2013 Explanation and Elaboration: Guidance for protocols of clinical trials. *BMJ*. 2013;346:e7586

|                                             |                     | Reporting Item                                                                                               | Page Number |
|---------------------------------------------|---------------------|--------------------------------------------------------------------------------------------------------------|-------------|
| <b>Administrative information</b>           |                     |                                                                                                              |             |
| Title                                       | <a href="#">#1</a>  | Descriptive title identifying the study design, population, interventions, and, if applicable, trial acronym | 1           |
| Trial registration                          | <a href="#">#2a</a> | Trial identifier and registry name. If not yet registered, name of intended registry                         | 2           |
| Trial registration: data set                | <a href="#">#2b</a> | All items from the World Health Organization Trial Registration Data Set                                     | 2           |
| Protocol version                            | <a href="#">#3</a>  | Date and version identifier                                                                                  | 2           |
| Funding                                     | <a href="#">#4</a>  | Sources and types of financial, material, and other support                                                  | 18          |
| Roles and responsibilities: contributorship | <a href="#">#5a</a> | Names, affiliations, and roles of protocol contributors                                                      | 1           |

|    |                           |                     |                                                                      |         |
|----|---------------------------|---------------------|----------------------------------------------------------------------|---------|
| 1  | Roles and                 | <a href="#">#5b</a> | Name and contact information for the trial sponsor                   | 18      |
| 2  | responsibilities:         |                     |                                                                      |         |
| 3  | sponsor contact           |                     |                                                                      |         |
| 4  | information               |                     |                                                                      |         |
| 5  |                           |                     |                                                                      |         |
| 6  |                           |                     |                                                                      |         |
| 7  |                           |                     |                                                                      |         |
| 8  | Roles and                 | <a href="#">#5c</a> | Role of study sponsor and funders, if any, in study design;          | 18      |
| 9  | responsibilities:         |                     | collection, management, analysis, and interpretation of data;        |         |
| 10 | sponsor and funder        |                     | writing of the report; and the decision to submit the report for     |         |
| 11 |                           |                     | publication, including whether they will have ultimate authority     |         |
| 12 |                           |                     | over any of these activities                                         |         |
| 13 |                           |                     |                                                                      |         |
| 14 |                           |                     |                                                                      |         |
| 15 |                           |                     |                                                                      |         |
| 16 | Roles and                 | <a href="#">#5d</a> | Composition, roles, and responsibilities of the coordinating centre, | NA      |
| 17 | responsibilities:         |                     | steering committee, endpoint adjudication committee, data            |         |
| 18 | committees                |                     | management team, and other individuals or groups overseeing the      |         |
| 19 |                           |                     | trial, if applicable (see Item 21a for data monitoring committee)    |         |
| 20 |                           |                     |                                                                      |         |
| 21 |                           |                     |                                                                      |         |
| 22 |                           |                     |                                                                      |         |
| 23 | <b>Introduction</b>       |                     |                                                                      |         |
| 24 |                           |                     |                                                                      |         |
| 25 | Background and            | <a href="#">#6a</a> | Description of research question and justification for undertaking   | 4 and 5 |
| 26 | rationale                 |                     | the trial, including summary of relevant studies (published and      |         |
| 27 |                           |                     | unpublished) examining benefits and harms for each intervention      |         |
| 28 |                           |                     |                                                                      |         |
| 29 |                           |                     |                                                                      |         |
| 30 | Background and            | <a href="#">#6b</a> | Explanation for choice of comparators                                | 5-7     |
| 31 | rationale: choice of      |                     |                                                                      |         |
| 32 | comparators               |                     |                                                                      |         |
| 33 |                           |                     |                                                                      |         |
| 34 |                           |                     |                                                                      |         |
| 35 |                           |                     |                                                                      |         |
| 36 | Objectives                | <a href="#">#7</a>  | Specific objectives or hypotheses                                    | 12      |
| 37 |                           |                     |                                                                      |         |
| 38 | Trial design              | <a href="#">#8</a>  | Description of trial design including type of trial (eg, parallel    | 5       |
| 39 |                           |                     | group, crossover, factorial, single group), allocation ratio, and    |         |
| 40 |                           |                     | framework (eg, superiority, equivalence, non-inferiority,            |         |
| 41 |                           |                     | exploratory)                                                         |         |
| 42 |                           |                     |                                                                      |         |
| 43 |                           |                     |                                                                      |         |
| 44 |                           |                     |                                                                      |         |
| 45 | <b>Methods:</b>           |                     |                                                                      |         |
| 46 | <b>Participants,</b>      |                     |                                                                      |         |
| 47 | <b>interventions, and</b> |                     |                                                                      |         |
| 48 | <b>outcomes</b>           |                     |                                                                      |         |
| 49 |                           |                     |                                                                      |         |
| 50 |                           |                     |                                                                      |         |
| 51 |                           |                     |                                                                      |         |
| 52 | Study setting             | <a href="#">#9</a>  | Description of study settings (eg, community clinic, academic        | 7       |
| 53 |                           |                     | hospital) and list of countries where data will be collected.        |         |
| 54 |                           |                     | Reference to where list of study sites can be obtained               |         |
| 55 |                           |                     |                                                                      |         |
| 56 |                           |                     |                                                                      |         |
| 57 | Eligibility criteria      | <a href="#">#10</a> | Inclusion and exclusion criteria for participants. If applicable,    | 7       |
| 58 |                           |                     | eligibility criteria for study centres and individuals who will      |         |
| 59 |                           |                     |                                                                      |         |
| 60 |                           |                     |                                                                      |         |

perform the interventions (eg, surgeons, psychotherapists)

|    |                      |                      |                                                                       |
|----|----------------------|----------------------|-----------------------------------------------------------------------|
| 1  |                      |                      |                                                                       |
| 2  |                      |                      |                                                                       |
| 3  | Interventions:       | <a href="#">#11a</a> | Interventions for each group with sufficient detail to allow          |
| 4  | description          |                      | replication, including how and when they will be administered         |
| 5  |                      |                      |                                                                       |
| 6  | Interventions:       | <a href="#">#11b</a> | Criteria for discontinuing or modifying allocated interventions for a |
| 7  | modifications        |                      | given trial participant (eg, drug dose change in response to harms,   |
| 8  |                      |                      | participant request, or improving / worsening disease)                |
| 9  |                      |                      |                                                                       |
| 10 |                      |                      |                                                                       |
| 11 | Interventions:       | <a href="#">#11c</a> | Strategies to improve adherence to intervention protocols, and any    |
| 12 | adherence            |                      | procedures for monitoring adherence (eg, drug tablet return;          |
| 13 |                      |                      | laboratory tests)                                                     |
| 14 |                      |                      |                                                                       |
| 15 |                      |                      |                                                                       |
| 16 | Interventions:       | <a href="#">#11d</a> | Relevant concomitant care and interventions that are permitted or     |
| 17 | concomitant care     |                      | prohibited during the trial                                           |
| 18 |                      |                      |                                                                       |
| 19 |                      |                      |                                                                       |
| 20 |                      |                      |                                                                       |
| 21 | Outcomes             | <a href="#">#12</a>  | Primary, secondary, and other outcomes, including the specific        |
| 22 |                      |                      | measurement variable (eg, systolic blood pressure), analysis metric   |
| 23 |                      |                      | (eg, change from baseline, final value, time to event), method of     |
| 24 |                      |                      | aggregation (eg, median, proportion), and time point for each         |
| 25 |                      |                      | outcome. Explanation of the clinical relevance of chosen efficacy     |
| 26 |                      |                      | and harm outcomes is strongly recommended                             |
| 27 |                      |                      |                                                                       |
| 28 |                      |                      |                                                                       |
| 29 |                      |                      |                                                                       |
| 30 | Participant timeline | <a href="#">#13</a>  | Time schedule of enrolment, interventions (including any run-ins      |
| 31 |                      |                      | and washouts), assessments, and visits for participants. A            |
| 32 |                      |                      | schematic diagram is highly recommended (see Figure)                  |
| 33 |                      |                      |                                                                       |
| 34 |                      |                      |                                                                       |
| 35 |                      |                      |                                                                       |
| 36 | Sample size          | <a href="#">#14</a>  | Estimated number of participants needed to achieve study              |
| 37 |                      |                      | objectives and how it was determined, including clinical and          |
| 38 |                      |                      | statistical assumptions supporting any sample size calculations       |
| 39 |                      |                      |                                                                       |
| 40 |                      |                      |                                                                       |
| 41 | Recruitment          | <a href="#">#15</a>  | Strategies for achieving adequate participant enrolment to reach      |
| 42 |                      |                      | target sample size                                                    |
| 43 |                      |                      |                                                                       |
| 44 |                      |                      |                                                                       |

**Methods: Assignment  
of interventions (for  
controlled trials)**

|    |                      |                      |                                                                      |
|----|----------------------|----------------------|----------------------------------------------------------------------|
| 45 |                      |                      |                                                                      |
| 46 |                      |                      |                                                                      |
| 47 |                      |                      |                                                                      |
| 48 |                      |                      |                                                                      |
| 49 |                      |                      |                                                                      |
| 50 | Allocation: sequence | <a href="#">#16a</a> | Method of generating the allocation sequence (eg, computer-          |
| 51 | generation           |                      | generated random numbers), and list of any factors for               |
| 52 |                      |                      | stratification. To reduce predictability of a random sequence,       |
| 53 |                      |                      | details of any planned restriction (eg, blocking) should be provided |
| 54 |                      |                      | in a separate document that is unavailable to those who enrol        |
| 55 |                      |                      | participants or assign interventions                                 |
| 56 |                      |                      |                                                                      |
| 57 |                      |                      |                                                                      |
| 58 |                      |                      |                                                                      |
| 59 |                      |                      |                                                                      |
| 60 |                      |                      |                                                                      |

|    |                        |                      |                                                                       |       |
|----|------------------------|----------------------|-----------------------------------------------------------------------|-------|
| 1  | Allocation concealment | <a href="#">#16b</a> | Mechanism of implementing the allocation sequence (eg, central        | 7-8   |
| 2  | mechanism              |                      | telephone; sequentially numbered, opaque, sealed envelopes),          |       |
| 3  |                        |                      | describing any steps to conceal the sequence until interventions are  |       |
| 4  |                        |                      | assigned                                                              |       |
| 5  |                        |                      |                                                                       |       |
| 6  |                        |                      |                                                                       |       |
| 7  |                        |                      |                                                                       |       |
| 8  | Allocation:            | <a href="#">#16c</a> | Who will generate the allocation sequence, who will enrol             | 7-8   |
| 9  | implementation         |                      | participants, and who will assign participants to interventions       |       |
| 10 |                        |                      |                                                                       |       |
| 11 | Blinding (masking)     | <a href="#">#17a</a> | Who will be blinded after assignment to interventions (eg, trial      | 7-8   |
| 12 |                        |                      | participants, care providers, outcome assessors, data analysts), and  |       |
| 13 |                        |                      | how                                                                   |       |
| 14 |                        |                      |                                                                       |       |
| 15 |                        |                      |                                                                       |       |
| 16 |                        |                      |                                                                       |       |
| 17 | Blinding (masking):    | <a href="#">#17b</a> | If blinded, circumstances under which unblinding is permissible,      | NA    |
| 18 | emergency unblinding   |                      | and procedure for revealing a participant's allocated intervention    |       |
| 19 |                        |                      | during the trial                                                      |       |
| 20 |                        |                      |                                                                       |       |
| 21 |                        |                      |                                                                       |       |
| 22 | <b>Methods: Data</b>   |                      |                                                                       |       |
| 23 | <b>collection,</b>     |                      |                                                                       |       |
| 24 | <b>management, and</b> |                      |                                                                       |       |
| 25 | <b>analysis</b>        |                      |                                                                       |       |
| 26 |                        |                      |                                                                       |       |
| 27 |                        |                      |                                                                       |       |
| 28 |                        |                      |                                                                       |       |
| 29 | Data collection plan   | <a href="#">#18a</a> | Plans for assessment and collection of outcome, baseline, and other   | 13-15 |
| 30 |                        |                      | trial data, including any related processes to promote data quality   |       |
| 31 |                        |                      | (eg, duplicate measurements, training of assessors) and a             |       |
| 32 |                        |                      | description of study instruments (eg, questionnaires, laboratory      |       |
| 33 |                        |                      | tests) along with their reliability and validity, if known. Reference |       |
| 34 |                        |                      | to where data collection forms can be found, if not in the protocol   |       |
| 35 |                        |                      |                                                                       |       |
| 36 |                        |                      |                                                                       |       |
| 37 |                        |                      |                                                                       |       |
| 38 |                        |                      |                                                                       |       |
| 39 | Data collection plan:  | <a href="#">#18b</a> | Plans to promote participant retention and complete follow-up,        | 13-15 |
| 40 | retention              |                      | including list of any outcome data to be collected for participants   |       |
| 41 |                        |                      | who discontinue or deviate from intervention protocols                |       |
| 42 |                        |                      |                                                                       |       |
| 43 |                        |                      |                                                                       |       |
| 44 | Data management        | <a href="#">#19</a>  | Plans for data entry, coding, security, and storage, including any    | 13-15 |
| 45 |                        |                      | related processes to promote data quality (eg, double data entry;     |       |
| 46 |                        |                      | range checks for data values). Reference to where details of data     |       |
| 47 |                        |                      | management procedures can be found, if not in the protocol            |       |
| 48 |                        |                      |                                                                       |       |
| 49 |                        |                      |                                                                       |       |
| 50 |                        |                      |                                                                       |       |
| 51 | Statistics: outcomes   | <a href="#">#20a</a> | Statistical methods for analysing primary and secondary outcomes.     | 12-17 |
| 52 |                        |                      | Reference to where other details of the statistical analysis plan can |       |
| 53 |                        |                      | be found, if not in the protocol                                      |       |
| 54 |                        |                      |                                                                       |       |
| 55 |                        |                      |                                                                       |       |
| 56 | Statistics: additional | <a href="#">#20b</a> | Methods for any additional analyses (eg, subgroup and adjusted        | 12-17 |
| 57 | analyses               |                      | analyses)                                                             |       |
| 58 |                        |                      |                                                                       |       |
| 59 |                        |                      |                                                                       |       |
| 60 |                        |                      |                                                                       |       |



|    |                            |                      |                                                                         |    |
|----|----------------------------|----------------------|-------------------------------------------------------------------------|----|
| 1  | Statistics: analysis       | <a href="#">#20c</a> | Definition of analysis population relating to protocol non-             | 16 |
| 2  | population and missing     |                      | adherence (eg, as randomised analysis), and any statistical methods     |    |
| 3  | data                       |                      | to handle missing data (eg, multiple imputation)                        |    |
| 4  |                            |                      |                                                                         |    |
| 5  |                            |                      |                                                                         |    |
| 6  | <b>Methods: Monitoring</b> |                      |                                                                         |    |
| 7  |                            |                      |                                                                         |    |
| 8  |                            |                      |                                                                         |    |
| 9  | Data monitoring:           | <a href="#">#21a</a> | Composition of data monitoring committee (DMC); summary of its          | NA |
| 10 | formal committee           |                      | role and reporting structure; statement of whether it is independent    |    |
| 11 |                            |                      | from the sponsor and competing interests; and reference to where        |    |
| 12 |                            |                      | further details about its charter can be found, if not in the protocol. |    |
| 13 |                            |                      | Alternatively, an explanation of why a DMC is not needed                |    |
| 14 |                            |                      |                                                                         |    |
| 15 |                            |                      |                                                                         |    |
| 16 |                            |                      |                                                                         |    |
| 17 | Data monitoring:           | <a href="#">#21b</a> | Description of any interim analyses and stopping guidelines,            | NA |
| 18 | interim analysis           |                      | including who will have access to these interim results and make        |    |
| 19 |                            |                      | the final decision to terminate the trial                               |    |
| 20 |                            |                      |                                                                         |    |
| 21 |                            |                      |                                                                         |    |
| 22 | Harms                      | <a href="#">#22</a>  | Plans for collecting, assessing, reporting, and managing solicited      | NA |
| 23 |                            |                      | and spontaneously reported adverse events and other unintended          |    |
| 24 |                            |                      | effects of trial interventions or trial conduct                         |    |
| 25 |                            |                      |                                                                         |    |
| 26 |                            |                      |                                                                         |    |
| 27 |                            |                      |                                                                         |    |
| 28 | Auditing                   | <a href="#">#23</a>  | Frequency and procedures for auditing trial conduct, if any, and        | NA |
| 29 |                            |                      | whether the process will be independent from investigators and the      |    |
| 30 |                            |                      | sponsor                                                                 |    |
| 31 |                            |                      |                                                                         |    |
| 32 |                            |                      |                                                                         |    |
| 33 | <b>Ethics and</b>          |                      |                                                                         |    |
| 34 | <b>dissemination</b>       |                      |                                                                         |    |
| 35 |                            |                      |                                                                         |    |
| 36 |                            |                      |                                                                         |    |
| 37 | Research ethics            | <a href="#">#24</a>  | Plans for seeking research ethics committee / institutional review      | 5  |
| 38 | approval                   |                      | board (REC / IRB) approval                                              |    |
| 39 |                            |                      |                                                                         |    |
| 40 |                            |                      |                                                                         |    |
| 41 | Protocol amendments        | <a href="#">#25</a>  | Plans for communicating important protocol modifications (eg,           | 5  |
| 42 |                            |                      | changes to eligibility criteria, outcomes, analyses) to relevant        |    |
| 43 |                            |                      | parties (eg, investigators, REC / IRBs, trial participants, trial       |    |
| 44 |                            |                      | registries, journals, regulators)                                       |    |
| 45 |                            |                      |                                                                         |    |
| 46 |                            |                      |                                                                         |    |
| 47 | Consent or assent          | <a href="#">#26a</a> | Who will obtain informed consent or assent from potential trial         | 7  |
| 48 |                            |                      | participants or authorised surrogates, and how (see Item 32)            |    |
| 49 |                            |                      |                                                                         |    |
| 50 |                            |                      |                                                                         |    |
| 51 | Consent or assent:         | <a href="#">#26b</a> | Additional consent provisions for collection and use of participant     | NA |
| 52 | ancillary studies          |                      | data and biological specimens in ancillary studies, if applicable       |    |
| 53 |                            |                      |                                                                         |    |
| 54 |                            |                      |                                                                         |    |
| 55 | Confidentiality            | <a href="#">#27</a>  | How personal information about potential and enrolled participants      | 7  |
| 56 |                            |                      | will be collected, shared, and maintained in order to protect           |    |
| 57 |                            |                      | confidentiality before, during, and after the trial                     |    |
| 58 |                            |                      |                                                                         |    |
| 59 |                            |                      |                                                                         |    |
| 60 |                            |                      |                                                                         |    |

|    |                                             |                      |                                                                                                                                                                                                                                                                                     |    |
|----|---------------------------------------------|----------------------|-------------------------------------------------------------------------------------------------------------------------------------------------------------------------------------------------------------------------------------------------------------------------------------|----|
| 1  | Declaration of interests                    | <a href="#">#28</a>  | Financial and other competing interests for principal investigators for the overall trial and each study site                                                                                                                                                                       | 18 |
| 2  |                                             |                      |                                                                                                                                                                                                                                                                                     |    |
| 3  |                                             |                      |                                                                                                                                                                                                                                                                                     |    |
| 4  | Data access                                 | <a href="#">#29</a>  | Statement of who will have access to the final trial dataset, and disclosure of contractual agreements that limit such access for investigators                                                                                                                                     | 2  |
| 5  |                                             |                      |                                                                                                                                                                                                                                                                                     |    |
| 6  |                                             |                      |                                                                                                                                                                                                                                                                                     |    |
| 7  |                                             |                      |                                                                                                                                                                                                                                                                                     |    |
| 8  |                                             |                      |                                                                                                                                                                                                                                                                                     |    |
| 9  |                                             |                      |                                                                                                                                                                                                                                                                                     |    |
| 10 | Ancillary and post trial care               | <a href="#">#30</a>  | Provisions, if any, for ancillary and post-trial care, and for compensation to those who suffer harm from trial participation                                                                                                                                                       | NA |
| 11 |                                             |                      |                                                                                                                                                                                                                                                                                     |    |
| 12 |                                             |                      |                                                                                                                                                                                                                                                                                     |    |
| 13 |                                             |                      |                                                                                                                                                                                                                                                                                     |    |
| 14 | Dissemination policy: trial results         | <a href="#">#31a</a> | Plans for investigators and sponsor to communicate trial results to participants, healthcare professionals, the public, and other relevant groups (eg, via publication, reporting in results databases, or other data sharing arrangements), including any publication restrictions | NA |
| 15 |                                             |                      |                                                                                                                                                                                                                                                                                     |    |
| 16 |                                             |                      |                                                                                                                                                                                                                                                                                     |    |
| 17 |                                             |                      |                                                                                                                                                                                                                                                                                     |    |
| 18 |                                             |                      |                                                                                                                                                                                                                                                                                     |    |
| 19 |                                             |                      |                                                                                                                                                                                                                                                                                     |    |
| 20 |                                             |                      |                                                                                                                                                                                                                                                                                     |    |
| 21 | Dissemination policy: authorship            | <a href="#">#31b</a> | Authorship eligibility guidelines and any intended use of professional writers                                                                                                                                                                                                      | NA |
| 22 |                                             |                      |                                                                                                                                                                                                                                                                                     |    |
| 23 |                                             |                      |                                                                                                                                                                                                                                                                                     |    |
| 24 | Dissemination policy: reproducible research | <a href="#">#31c</a> | Plans, if any, for granting public access to the full protocol, participant-level dataset, and statistical code                                                                                                                                                                     | NA |
| 25 |                                             |                      |                                                                                                                                                                                                                                                                                     |    |
| 26 |                                             |                      |                                                                                                                                                                                                                                                                                     |    |
| 27 |                                             |                      |                                                                                                                                                                                                                                                                                     |    |
| 28 | <b>Appendices</b>                           |                      |                                                                                                                                                                                                                                                                                     |    |
| 29 |                                             |                      |                                                                                                                                                                                                                                                                                     |    |
| 30 |                                             |                      |                                                                                                                                                                                                                                                                                     |    |
| 31 | Informed consent materials                  | <a href="#">#32</a>  | Model consent form and other related documentation given to participants and authorised surrogates                                                                                                                                                                                  | NA |
| 32 |                                             |                      |                                                                                                                                                                                                                                                                                     |    |
| 33 |                                             |                      |                                                                                                                                                                                                                                                                                     |    |
| 34 | Biological specimens                        | <a href="#">#33</a>  | Plans for collection, laboratory evaluation, and storage of biological specimens for genetic or molecular analysis in the current trial and for future use in ancillary studies, if applicable                                                                                      | NA |
| 35 |                                             |                      |                                                                                                                                                                                                                                                                                     |    |
| 36 |                                             |                      |                                                                                                                                                                                                                                                                                     |    |
| 37 |                                             |                      |                                                                                                                                                                                                                                                                                     |    |
| 38 |                                             |                      |                                                                                                                                                                                                                                                                                     |    |
| 39 |                                             |                      |                                                                                                                                                                                                                                                                                     |    |

40 The SPIRIT Explanation and Elaboration paper is distributed under the terms of the Creative Commons  
 41 Attribution License CC-BY-NC. This checklist was completed on 27. October 2023 using  
 42 <https://www.goodreports.org/>, a tool made by the [EQUATOR Network](#) in collaboration with [Penelope.ai](#)  
 43  
 44  
 45  
 46  
 47  
 48  
 49  
 50  
 51  
 52  
 53  
 54  
 55  
 56  
 57  
 58  
 59

# BMJ Open

## SCALE-UP II: Protocol for a Pragmatic Randomized Trial Examining Population Health Management Interventions to Increase the Uptake of At-Home COVID-19 Testing in Community Health Centers

|                                 |                                                                                                                                                                                                                                                                                                                                                                                                                                                                                                                                                                                                                                                                                                                                                                                                                                                                                                                                                                                                                                                                                                                                                                                                                                                                                                                                                                                                                                                                                                                                                                                                                                                                                                                                                                                                                             |
|---------------------------------|-----------------------------------------------------------------------------------------------------------------------------------------------------------------------------------------------------------------------------------------------------------------------------------------------------------------------------------------------------------------------------------------------------------------------------------------------------------------------------------------------------------------------------------------------------------------------------------------------------------------------------------------------------------------------------------------------------------------------------------------------------------------------------------------------------------------------------------------------------------------------------------------------------------------------------------------------------------------------------------------------------------------------------------------------------------------------------------------------------------------------------------------------------------------------------------------------------------------------------------------------------------------------------------------------------------------------------------------------------------------------------------------------------------------------------------------------------------------------------------------------------------------------------------------------------------------------------------------------------------------------------------------------------------------------------------------------------------------------------------------------------------------------------------------------------------------------------|
| Journal:                        | <i>BMJ Open</i>                                                                                                                                                                                                                                                                                                                                                                                                                                                                                                                                                                                                                                                                                                                                                                                                                                                                                                                                                                                                                                                                                                                                                                                                                                                                                                                                                                                                                                                                                                                                                                                                                                                                                                                                                                                                             |
| Manuscript ID                   | bmjopen-2023-081455.R1                                                                                                                                                                                                                                                                                                                                                                                                                                                                                                                                                                                                                                                                                                                                                                                                                                                                                                                                                                                                                                                                                                                                                                                                                                                                                                                                                                                                                                                                                                                                                                                                                                                                                                                                                                                                      |
| Article Type:                   | Protocol                                                                                                                                                                                                                                                                                                                                                                                                                                                                                                                                                                                                                                                                                                                                                                                                                                                                                                                                                                                                                                                                                                                                                                                                                                                                                                                                                                                                                                                                                                                                                                                                                                                                                                                                                                                                                    |
| Date Submitted by the Author:   | 09-Feb-2024                                                                                                                                                                                                                                                                                                                                                                                                                                                                                                                                                                                                                                                                                                                                                                                                                                                                                                                                                                                                                                                                                                                                                                                                                                                                                                                                                                                                                                                                                                                                                                                                                                                                                                                                                                                                                 |
| Complete List of Authors:       | <p>Del Fiol, Guilherme; The University of Utah, Department of Biomedical Informatics<br/> Orleans, Brian; University of Utah<br/> Kuzmenko, Tatyana; University of Utah, Department of Biomedical Informatics<br/> Chipman, Jonathan; University of Utah, Department of Population Health Sciences<br/> Greene, Tom; University of Utah, Population Health Sciences<br/> Martinez, Anna; University of Utah<br/> Wirth, Jennifer; University of Utah<br/> Meads, Ray; University of Utah<br/> Kaphingst, Kim; University of Utah Health Huntsman Cancer Institute, Department of Communication<br/> Gibson, Bryan; University of Utah, Department of Biomedical Informatics<br/> Kawamoto, K; The University of Utah<br/> King, Andy; University of Utah, Department of Communication<br/> Siaperas, Tracey; Association for Utah Community Health<br/> Hughes, Shlisa; Association for Utah Community Health<br/> Pruhs, Alan; Association for Utah Community Health<br/> Pariera Dinkins, Courtney; Association for Utah Community Health<br/> Lam, Cho; University of Utah, Department of Population Health Sciences<br/> Pierce, Joni; University of Utah, Department of Biomedical Informatics<br/> Benson, Ryzen; University of Utah, Department of Biomedical Informatics<br/> Borsato, Emerson; University of Utah, Department of Biomedical Informatics<br/> Cornia, Ryan; University of Utah, Department of Biomedical Informatics<br/> Stevens, Leticia; University of Utah, Department of Biomedical Informatics<br/> Bradshaw, Richard; University of Utah, Department of Biomedical Informatics<br/> Schlechter, Chelsey; University of Utah Health Huntsman Cancer Institute, Center for Health Outcomes and Population Equity<br/> Wetter, David; Huntsman Cancer Institute, Population Health Sciences</p> |
| <b>Primary Subject Heading</b>: | Health informatics                                                                                                                                                                                                                                                                                                                                                                                                                                                                                                                                                                                                                                                                                                                                                                                                                                                                                                                                                                                                                                                                                                                                                                                                                                                                                                                                                                                                                                                                                                                                                                                                                                                                                                                                                                                                          |

1  
2  
3  
4  
5  
6  
7  
8  
9  
10  
11  
12  
13  
14  
15  
16  
17  
18  
19  
20  
21  
22  
23  
24  
25  
26  
27  
28  
29  
30  
31  
32  
33  
34  
35  
36  
37  
38  
39  
40  
41  
42  
43  
44  
45  
46  
47  
48  
49  
50  
51  
52  
53  
54  
55  
56  
57  
58  
59  
60

|                            |                                                                                                                                                                            |
|----------------------------|----------------------------------------------------------------------------------------------------------------------------------------------------------------------------|
| Secondary Subject Heading: | Health services research, Infectious diseases, Public health                                                                                                               |
| Keywords:                  | COVID-19, Health Equity, Health informatics < BIOTECHNOLOGY & BIOINFORMATICS, Information technology < BIOTECHNOLOGY & BIOINFORMATICS, Public health < INFECTIOUS DISEASES |
|                            |                                                                                                                                                                            |

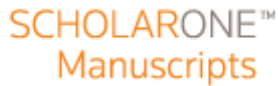

1  
2  
3 SCALE-UP II: Protocol for a Pragmatic Randomized Trial Examining Population Health Management  
4  
5 Interventions to Increase the Uptake of At-Home COVID-19 Testing in Community Health Centers  
6  
7  
8

9 Guilherme Del Fiol,<sup>1</sup> Brian Orleans,<sup>2</sup> Tatyana V. Kuzmenko,<sup>1</sup> Jonathan Chipman,<sup>3</sup> Tom Greene,<sup>3</sup> Anna  
10 Martinez,<sup>2</sup> Jennifer Wirth,<sup>2</sup> Ray Meads,<sup>2</sup> Kimberly A. Kaphingst,<sup>2,4</sup> Bryan Gibson,<sup>1</sup> Kensaku Kawamoto,<sup>1</sup>  
11 Andy J. King,<sup>2,4</sup> Tracey Siaperas,<sup>2,5</sup> Shlisa Hughes,<sup>5</sup> Alan Pruhs,<sup>5</sup> Courtney Pariera Dinkins,<sup>5</sup> Cho Y.  
12 Lam,<sup>2,3</sup> Joni H. Pierce,<sup>1</sup> Ryzen Benson,<sup>1</sup> Emerson P. Borsato,<sup>1</sup> Ryan C. Cornia,<sup>1</sup> Leticia Stevens,<sup>1</sup> Richard  
13 L. Bradshaw,<sup>1</sup> Chelsey R. Schlechter,<sup>2,3</sup> David W. Wetter<sup>2,3</sup>  
14  
15  
16  
17  
18  
19  
20  
21

22 <sup>1</sup> Department of Biomedical Informatics, University of Utah, Salt Lake City, Utah, USA

23 <sup>2</sup> Huntsman Cancer Institute, University of Utah, Salt Lake City, Utah, USA

24 <sup>3</sup> Department of Population Health Sciences, University of Utah, Salt Lake City, Utah, USA

25 <sup>4</sup> Department of Communication, University of Utah, Salt Lake City, Utah, USA

26 <sup>5</sup> Association for Utah Community Health, Salt Lake City, Utah, USA  
27  
28  
29  
30  
31  
32  
33  
34

35 **Corresponding author:** Guilherme Del Fiol, M.D., Ph.D.

36 Department of Biomedical Informatics

37 University of Utah

38 Email: [guilherme.delfiol@utah.edu](mailto:guilherme.delfiol@utah.edu)

39 Address: 421 Wakara Way, Suite 140

40 Salt Lake City, Utah 84018  
41  
42  
43  
44  
45  
46  
47  
48  
49

50 **Word Count:** 3,919  
51  
52  
53  
54  
55  
56  
57  
58  
59  
60

## ABSTRACT

**Introduction.** SCALE-UP II aims to investigate the effectiveness of population health management interventions using text messaging (TM), chatbots, and patient navigation (PN) in increasing the uptake of at-home COVID-19 testing among patients in historically marginalized communities, specifically those receiving care at community health centers (CHCs).

**Methods and Analysis.** The trial is a multi-site, randomized pragmatic clinical trial. Eligible patients are  $\geq 18$  years old with a primary care visit in the last three years at one of the participating CHCs. Demographic data will be obtained from CHC electronic health records. Patients will be randomized to one of two factorial designs based on smartphone ownership. Patients who self-report replying to a text message that they have a smartphone will be randomized in a 2x2x2 factorial fashion to receive (i) chatbot or TM; (ii) PN (yes or no); and (iii) repeated offers to interact with the interventions every 10 or 30 days. Participants who do not self-report as having a smartphone will be randomized in a 2x2 factorial fashion to receive (i) TM with or without PN; and (ii) repeated offers every 10 or 30 days. The interventions will be sent in English or Spanish, with an option to request at-home COVID-19 test kits. The primary outcome is the proportion of participants using at-home COVID-19 tests during a 90-day follow-up. The study will evaluate main effects and interactions among interventions, implementation outcomes, and predictors and moderators of study outcomes. Statistical analyses will include logistic regression, stratified subgroup analyses, and adjustment for stratification factors.

**Ethics and dissemination:** The protocol was approved by the University of Utah Institutional Review Board. On completion, study data will be made available in compliance with National Institutes of Health data sharing policies. Results will be disseminated through study partners and peer-reviewed publications.

**Trial registration:** Clinicaltrials.gov (NCT05533918 and NCT05533359).

**Keywords:** COVID-19, digital health, health equity, population health management

### Strengths and limitations of this study

**Strengths**

- Uses scalable population health management interventions to increase the reach and uptake of at-home COVID-19 testing.
- Dissemination strategy modalities (i.e., voice and text cellphones) are nearly ubiquitous among adults in the United States, including among historically marginalized populations.

**Limitations**

- The study relies on self-reported data for its primary outcome (use of at-home testing).
- Patient population will be drawn from community health centers that opted to participate in this study, all of which are located in a single state in the United States, which limits generalizability.

## INTRODUCTION

Racial/ethnic minority, low socioeconomic status (SES), and rural populations suffer profound health inequities across a wide variety of conditions, including a higher rate of hospitalization and mortality due to COVID-19.[1-4] Similar inequities have been found across the US for vaccination rates between urban and rural,[5] high and low SES,[6] and White and non-White populations.[7, 8] Low vaccination rates and withdrawal of protection measures leave historically marginalized populations at high risk for local outbreaks and more contagious variants.

Although public health agencies worldwide have declared the end of the pandemic, timely testing is still important to help reduce exposure and offer timely treatment to individuals at a higher risk for severe disease. However, historically marginalized communities lacked easy and convenient access to testing throughout the COVID-19 pandemic, especially after the closure of mass test sites nationwide.[9, 10] Although several FDA-approved at-home tests are available, providing a convenient, quick and low-cost alternative for patients to test at home,[11, 12] substantial disparities exist in the use of at-home COVID-19 testing. While the use of at-home COVID-19 testing has more than tripled between the Delta and Omicron outbreaks, use of at-home testing was more than twice as high among individuals identifying as White, having high SES, and having a postgraduate degree.[13] Thus, scalable approaches are needed to promote the uptake of at-home COVID-19 testing among individuals from historically marginalized communities.

Despite evidence of a digital divide between high resource healthcare systems and low resource community health centers (CHCs),[14, 15] historically marginalized populations have almost universal access to technology such as cellphones, which provide opportunities for large scale population health management (PHM) interventions. Even in households with annual incomes less than \$30,000, 97% own a cellphone and 76% own a smartphone.[16] The SCALE-UP II trial will investigate three PHM interventions (text messaging [TM], automated chatbot, and patient navigation [PN]) to increase the reach and uptake of at-home COVID-19 testing among patients who receive care at CHCs.

## METHODS AND ANALYSIS



1  
2  
3 This protocol was developed using the Standard Protocol Items: Recommendations for  
4  
5  
6  
7  
8  
9  
10  
11  
12  
13  
14  
15  
16  
17  
18  
19  
20  
21  
22  
23  
24  
25  
26  
27  
28  
29  
30  
31  
32  
33  
34  
35  
36  
37  
38  
39  
40  
41  
42  
43  
44  
45  
46  
47  
48  
49  
50  
51  
52  
53  
54  
55  
56  
57  
58  
59  
60  
This protocol was developed using the Standard Protocol Items: Recommendations for  
Interventional Trials (SPIRIT).[17] The protocol was approved by the Institutional Review Board at the  
University of Utah on June 10, 2022 (IRB\_00150669). The trial was registered with Clinicaltrials.gov  
(NCT05533359 for patients self-reporting that they have a smartphone and NCT05533918 for all other  
patients) on September 9, 2022. Enrollment was planned to begin in December 2022 and data collection  
was planned to end in November 2023.

### **Patient and Public Involvement**

SCALE-UP II is conducted in partnership with the Association for Utah Community Health  
(AUCH), CHCs across Utah, the Utah Department of Health and Human Services (UDHHS), and the  
University of Utah. Our research-practice partnership uses a multi-pronged community engagement  
approach to (i) identify research questions, (ii) develop, adapt, and implement interventions, and (iii)  
inform dissemination plans.[18, 19] The community engagement approach includes a weekly project  
meeting with AUCH, UDHHS, and the research team and quarterly Patient Advisory Committee (PAC;  
consisting of CHC patient representatives) and Study Advisory Committee (SAC; consisting of patients,  
CHC staff, UDHHS, and AUCH representatives) meetings. The research objectives of SCALE-UP II  
were identified in partnership with AUCH and UDHHS; both AUCH and UDHHS were interested in  
addressing the impact of COVID-19 among historically marginalized communities in Utah. Input from  
the PAC informed the design of the text messaging and chatbot interventions. Furthermore, TM and  
Chatbot scripts were developed following information gathered from community members in Utah.

### **Study Design**

SCALE-UP II is an individually randomized, multi-site, pragmatic clinical trial. The experimental  
design varies according to each patient's response to a text message asking if they have a smartphone.  
Participants who self-report that they have a smartphone will be randomized in a 2x2x2 factorial fashion  
to receive (i) chatbot or TM; (ii) PN (yes or no); and (iii) repeated offers to interact with the interventions  
every 10 or 30 days. Participants who do not respond to the introductory text message or who self-report

1  
2  
3 as not having a smartphone will be randomized in a 2x2 factorial fashion to receive (i) TM with or  
4 without PN; and (ii) repeated offers every 10 or 30 days.  
5  
6  
7

8  
9  
10 Figure 1 – SCALE-UP II Trial Design.

### 11 **Rationale for Study Design**

12  
13 The interventions in SCALE-UP II interventions leverage (i) wide adoption of electronic health  
14 record (EHR) systems, even in low resource CHCs;[20, 21] (ii) wide adoption of cellphones with at least  
15 voice and text capabilities;[16] and (iii) the low cost, efficiency, and simplicity of at-home COVID-19  
16 tests.[11, 12] Therefore, SCALE-UP II is designed to maximize reach with low-cost interventions to  
17 increase the uptake of COVID-19 testing in historically marginalized communities.  
18  
19  
20  
21  
22  
23

24 SCALE-UP II will enroll patients from Utah CHCs. These settings provide primary care to  
25 diverse, low SES populations, and provide an ideal setting to address COVID-19 because there is an  
26 established relationship and coordination of care, and ~80% of individuals see a primary care provider at  
27 least annually.[22] Three Utah CHC systems and their 12 primary care clinics will participate in SCALE-  
28 UP II. Demographics of SCALE-UP II CHC patients include: 51% Latino, 62%  $\leq$ 100% federal poverty  
29 level, 69% uninsured, and receiving care in clinics where 17% are in rural/frontier areas.[23]  
30  
31  
32  
33  
34  
35  
36

37 Since the chatbot requires a smartphone with connection to the internet, and about 25% of  
38 individuals with low SES and from rural areas do not have a smartphone,[16] SCALE-UP II will enroll  
39 patients in one of two factorial designs based on their smartphone ownership in order to maximize reach  
40 to the 96% of individuals who own at least a voice and text cellphone.  
41  
42  
43  
44

45 Patients may be reluctant to test due to hesitancy and numerous other barriers.[24, 25] However,  
46 practical advice from patient navigators such as community health workers can help overcome hesitancy  
47 and engagement barriers such as logistics, transportation, and expense; of critical importance, providers  
48 welcome the use of these approaches with their patients.[26-28] Thus, in addition to the TM and chatbot  
49 interventions, SCALE-UP II will examine the added effect of offering access to patient navigation upon  
50 request through either intervention. Since patient navigation is a human-intensive intervention, examining  
51  
52  
53  
54  
55  
56  
57  
58  
59  
60

1  
2  
3 the uptake of patient navigation when provided only upon request is critical for conserving resources in  
4 limited resource settings such as CHCs.  
5  
6

## 7 **Participants**

8  
9 The study inclusion criteria aim to enroll a broad range of individuals to maximize reach. Eligible  
10 patients will be those who (i) have been seen at one of the participating CHCs in the last three years, (ii)  
11 are 18 years and older, (iii) have a working cellphone listed in the CHC EHR, and (iv) indicate a language  
12 preference in the EHR of English or Spanish.  
13  
14  
15  
16

17  
18 The study will exclude participants who opt out upon receipt of the introductory message asking  
19 about smartphone ownership. Also, if more than one patient shares the same smartphone number in the  
20 EHR, only the patient with the most recent documented clinical encounter will be included.  
21  
22  
23

## 24 **Recruitment**

25  
26 As a pragmatic trial with interventions that offer minimal risk, the University of Utah IRB  
27 approved a waiver of consent for randomization and receipt of PHM interventions. Therefore, all  
28 participants who meet eligibility criteria will be automatically enrolled in the study. All three study points  
29 of contact (TM, chatbot, PN) will allow participants to opt-out through a simple reply at any time.  
30  
31  
32  
33  
34  
35  
36  
37  
38  
39  
40  
41  
42  
43  
44  
45  
46  
47  
48  
49  
50  
51  
52  
53  
54  
55  
56  
57  
58  
59  
60

## 61 **Randomization and Blinding**

62  
63  
64  
65  
66  
67  
68  
69  
70  
71  
72  
73  
74  
75  
76  
77  
78  
79  
80  
81  
82  
83  
84  
85  
86  
87  
88  
89  
90  
91  
92  
93  
94  
95  
96  
97  
98  
99  
100

101  
102  
103  
104  
105  
106  
107  
108  
109  
110  
111  
112  
113  
114  
115  
116  
117  
118  
119  
120  
121  
122  
123  
124  
125  
126  
127  
128  
129  
130  
131  
132  
133  
134  
135  
136  
137  
138  
139  
140  
141  
142  
143  
144  
145  
146  
147  
148  
149  
150  
151  
152  
153  
154  
155  
156  
157  
158  
159  
160

1  
2  
3 CHC and urban/rural designation of the participant's zip code according to rural-urban commuting area  
4 (RUCA) codes.  
5

6  
7 The study is outcome assessor and investigator blinded. Patient navigators cannot be blinded to  
8 treatment assignment. Participants will be blinded to study participation.  
9

## 10 11 **Study Interventions**

12  
13 Overall, all study interventions (i) are sent on behalf of the participant's clinic, (ii) offer the  
14 option to request at-home mailed COVID-19 test kits at no cost for use as needed, (iii) are provided  
15 automatically in English or Spanish based on the patient's preferred language in the CHC EHR, and (iv)  
16 provide an option for participants to opt-out at any time (see Figures 2 and 3). Eligible patients and their  
17 demographics data (e.g, name, date of birth, race, ethnicity, language, address, cellphone) will be  
18 extracted from the CHC EHRs through EHR reports prior to the trial launch. Demographics data will be  
19 used to determine eligibility, support study interventions, and for study analyses.  
20  
21  
22  
23  
24  
25  
26  
27  
28  
29

30  
31 Figure 2 – Sample text message conversation offering COVID-19 at-home testing.  
32

33  
34 Figure 3 – Sequential screenshot of chatbot intervention showing a question being answered, followed by  
35 options to ask further questions, and request a COVID-19 test kit to be mailed to the patient's home.  
36

37  
38 Text Messaging (TM). Meta-analyses of text messaging interventions have found these  
39 approaches to be promising for improving compliance with healthy behaviors and preventive care,  
40 beneficial for multiple racial/ethnic groups, and inexpensive to deliver.[29-34] A US Department of  
41 Health and Human Services review concluded: *With the near-ubiquitous presence of cellphones and the*  
42 *rapid growth of smartphones, text messaging and other mHealth interventions can remove traditional*  
43 *geographic and economic barriers to access to health information and services. The higher rates of*  
44 *mobile phone ownership and use among Blacks and Hispanics, compared to Whites, are particularly*  
45 *noteworthy. These interventions have the potential to improve health knowledge, behaviors, and outcomes*  
46 *and, ultimately, to reduce disparities.*[34] Our own research has demonstrated that a simple, repeated  
47  
48  
49  
50  
51  
52  
53  
54  
55  
56  
57  
58  
59  
60

1  
2  
3 offer to connect unmotivated, low-SES individuals with treatment resources resulted in 25% of  
4 individuals enrolling in tobacco cessation treatment.[35] Thus, repeated prompting offering access to  
5 COVID-19 testing via texts is an extremely convenient, low cost, scalable approach for increasing testing  
6 uptake.  
7  
8  
9  
10

11 TM will consist of bidirectional text messaging sent on behalf of the participant's clinic with a  
12 response option for patients to request at-home mailed COVID-19 test kits at no cost (Figure 2).  
13  
14 Participants randomized to TM+PN will also be able to reply requesting to speak with a patient navigator.  
15  
16 Messages will be sent in English or Spanish based on the patient's language preference in the EHR.  
17  
18  
19

20 Chatbot. Chatbots are automated conversational agents designed to mimic human interaction.  
21  
22 Chatbots are increasingly popular in various health contexts as they can be easily accessed through  
23 smartphones, tablets, laptops, or desktops. Chatbots have many advantages for patient engagement,  
24 including providing scripted education interactively, chunking information into small segments that are  
25 easier to process, and allowing for choice in the amount of information received. Chatbots are accessible  
26 to the vast majority of U.S. adults. Even in households with annual incomes less than \$30,000, 76% own  
27 a smartphone.[16, 36, 37] Delivery of health services through chatbots in research contexts has been  
28 successfully tested in various health domains such as mental health, asthma, diabetes management, and  
29 physical activity uptake.[38] While scripted chatbots have been widely used in the COVID-19 pandemic,  
30 especially to evaluate patient's eligibility for testing and vaccination,[39-44] research is needed to  
31 examine their benefits in addressing COVID-19 at-home testing. In addition, there is a lack of studies that  
32 investigated the design and implementation of chatbots specifically for historically marginalized  
33 populations.  
34  
35  
36  
37  
38  
39  
40  
41  
42  
43  
44  
45  
46

47 For SCALE-UP II, we designed a scripted chatbot (i.e., predefined conversation script, and a fixed set  
48 of questions and scripted answers) that presents participants with a list of topics that address most  
49 common knowledge gaps and hesitancy factors related to at-home COVID-19 testing (Figure 3). The  
50 chatbot script was designed and guided by findings from a national survey and in-depth interviews with  
51 participants in the targeted Utah population, both conducted by our team. The following topics are  
52  
53  
54  
55  
56  
57  
58  
59  
60

1  
2  
3 covered: benefits of testing (even when already vaccinated or previously had COVID), when to test, test  
4 accuracy, how to use a test, and what to do if a test is positive. Both text messaging and chatbot scripts  
5 were validated through feedback from the study and patient advisory committee composed of clinical  
6 staff and patients from the participating CHCs.  
7  
8  
9  
10

11 Patients in the chatbot condition will receive a text message on behalf of their clinic offering a  
12 hyperlink to access the chatbot on the phone's web browser. At any point in the chatbot, participants will  
13 be able to click a button to request an at-home test kit. Participants randomized to the PN condition can  
14 also click PERSON to request to speak to a patient navigator. As in TM, the chatbot is offered both in  
15 English and Spanish.  
16  
17  
18  
19  
20  
21

22 Patient Navigation (PN). SCALE-UP II will use community health workers (CHWs) employed  
23 by AUCH as patient navigators to address practical barriers, motivation, and hesitancy to COVID-19  
24 testing. To assist navigators in working with patients, CHWs will be trained in an empirically-validated  
25 behavior change approach (Motivation And Problem Solving; MAPS).[45-50] MAPS is a holistic,  
26 dynamic approach to behavior change that integrates two empirically validated approaches (motivational  
27 interviewing[51, 52] and practical problem solving[47, 53, 54]) for helping patients engage in target  
28 behaviors.[45-47, 49, 50] Importantly, MAPS addresses patients' social determinants of health, and  
29 provides practical advice and connections to services whenever possible, including addressing testing  
30 concerns (e.g., worries about repercussions of a positive test, infecting family members, quarantining,  
31 financial). MAPS has been demonstrated to be effective in numerous randomized controlled trials with  
32 respect to increasing enrollment in evidence-based interventions, as well as enhancing and maintaining  
33 behavior change.[45-47, 49, 50]  
34  
35  
36  
37  
38  
39  
40  
41  
42  
43  
44  
45  
46

47 All SCALE-UP II navigators will receive ~20 hours of training, consistent with recommended  
48 training for helpline specialists.[55] Participants randomized to the PN condition who request to speak  
49 with a patient navigator will receive a phone call within 48 hours, although it is anticipated that most  
50 patients would be called within the same day or in the next day. Patient navigators will make three  
51 attempts to contact a participant.  
52  
53  
54  
55  
56  
57  
58  
59  
60

## Study Roll-Out Schedule

To ensure that the interventions work properly with real patient data, a pilot study will be conducted with a random sample of patients from one of the participating CHCs both for the TM and Chatbot interventions.

For the remainder of patients, to address bottlenecks that depend on non-automated processes (e.g., mailing of test kits, patient navigation), study participants will be exposed to interventions in one of 14 weekly batches according to a pre-defined schedule, in which a cohort with a new set of participants is added to the study every week. Participants will be randomly allocated across the 14 batches, also stratified by CHC and urban vs. rural.

Every cycle starts by sending the introductory message to participants in the cohort (Day -2). Participants will have two days to respond. After that, eligible participants will be randomized into one of the two factorial designs depending on their response to the introductory message (Day 0). After randomization, participants will receive messages offering access to at-home testing once every 10 versus 30 days for 7 weeks (Days 0, 10, 20, 30, 40, 50, and 60 vs. Days 0, 30, and 60).

## Outcome Assessment

The main study outcomes are described below. Table 1 provides a complete list including the primary, secondary outcomes, and implementation outcomes, as well as predictors and moderators of study outcomes.

Primary Outcomes and Hypotheses. The primary outcome is *Testing*; the proportion of study participants who use an at-home COVID-19 test at least once during the course of 90-day study follow-up as defined below. For all patients, regardless of self-report of smartphone ownership, the primary hypotheses are main effects for PN (PN > No PN), main effects for message frequency (10-day > 30-day), and that TM+PN will lead to higher *Testing* than TM. These hypotheses will be tested at an alpha of .0167, adjusted for multiple comparisons using the Bonferroni method. Because we anticipate a low sample size of smartphone self-reporters to be adequately powered, we consider Chatbot-related

1  
2  
3 hypotheses as secondary. These include the hypothesis that Chatbot will lead to a higher *Testing* than TM  
4 and that Chatbot+PN will lead to a higher *Testing* than Chatbot without PN. These hypotheses will be  
5 tested at alpha of .05.  
6  
7

8  
9 Secondary and Implementation Outcomes. We will evaluate Chatbot+PN versus Chatbot,  
10 interaction effects, and indicators of TM, Chatbot, and PN implementation among participants.  
11  
12 Implementation outcomes measure the extent of the delivery and adaptation of intervention components,  
13 including *Reach-Engage Testing* (proportion of participants who are offered at-home testing and reply to  
14 the message or launch the Chatbot), *Reach-Accept Testing* (proportion of participants who are offered at-  
15 home testing and reply accepting or select “Send me a test” on the Chatbot), *PN-Request* (proportion of  
16 participants in the PN condition who request patient navigation), *PN-Engage* (proportion of participants  
17 in the PN condition who talk to a patient navigator), and *Opt-Out* (proportion of participants who opt-  
18 out). We will analyze chatbot usage patterns (e.g., time using chatbot, topics visited) as listed in Table 1.  
19  
20  
21  
22  
23  
24  
25  
26  
27

28 Predictors and Moderators of Study Outcomes. We will assess predictors and moderators  
29 including demographics, vaccination status, and Tier 1 Common Data Elements (CDEs) used by the  
30 Rapid Acceleration of Diagnostics-Underserved Populations (RADx-UP) program of the U.S. National  
31 Institutes of Health (NIH).[56]  
32  
33  
34  
35  
36

37 Study Assessments. The primary outcome *Testing* will be collected through two methods from  
38 patients who requested a test kit: (i) a brief text message sent 90 days after the first exposure to  
39 interventions asking if they used the mailed COVID-19 test at least once (patients are asked to reply with  
40 a single YES or NO response to the text message); and (ii) a survey sent to participants 7 days after the  
41 last exposure to study interventions (Day 97). Secondary outcomes *Reach-Engage Testing*, *Reach-Accept*  
42 *Testing*, *PN-Request*, *PN-Engage*, and *Opt-Out* will be obtained from computer system logs. The survey  
43 will also collect Tier 1 CDEs. To complete the survey, participants will be invited via mail and text  
44 message to complete a survey. Non-responders will also be called via phone to complete an interviewer-  
45 administered survey. Vaccination status will be obtained from the Utah State Immunization Information  
46 System (USIIS). Other predictors and moderators of study outcomes will be collected from EHR data  
47  
48  
49  
50  
51  
52  
53  
54  
55  
56  
57  
58  
59  
60



(e.g., demographics) and online surveys (i.e., Tier 1 CDEs).

**Table 1 - Study Assessments.**

| Assessment                                          | Baseline | During exposure to interventions | Day 90 Follow-Up (via text msg) | Day 97 Follow-Up (via survey) | Description                                                                                                                                 |
|-----------------------------------------------------|----------|----------------------------------|---------------------------------|-------------------------------|---------------------------------------------------------------------------------------------------------------------------------------------|
| Demographics                                        | X        |                                  |                                 | X                             | Age sex, race, ethnicity, preferred language, insurance status, etc.                                                                        |
| Testing (primary outcome)                           |          |                                  | X                               | X                             | Proportion of study participants who use an at-home COVID-19 test during the course of the study                                            |
| Number of tests used                                |          |                                  | X                               | X                             | Self-reported number of tests used by each study participant who requested a test.                                                          |
| Vaccination status                                  | X        |                                  |                                 | X                             | COVID-19 vaccination status according to state immunization registry                                                                        |
| NIH RAD <sub>x</sub> -UP CDE data elements (Tier 1) |          |                                  |                                 | X                             | Comprehensive questionnaire (234 items) including demographics, COVID testing, symptoms, health status, social determinants of health, etc. |
| <b>Implementation Outcomes</b>                      |          |                                  |                                 |                               |                                                                                                                                             |
| Reach-Engage Testing                                |          | X                                |                                 |                               | Proportion of participants who are offered at-home testing and reply to the message or launch the chatbot                                   |
| Reach-Engage Frequency                              |          | X                                |                                 |                               | Number of times a participant replied to a message offering at-home testing or launched the chatbot                                         |
| Reach-Accept Testing                                |          | X                                |                                 |                               | Proportion of participants who are offered at-home testing and reply accepting                                                              |
| Reach-Engage Frequency                              |          | X                                |                                 |                               | Number of times a participant replied to a                                                                                                  |

| Assessment                | Baseline | During exposure to interventions | Day 90 Follow-Up (via text msg) | Day 97 Follow-Up (via survey) | Description                                                                                                                                                 |
|---------------------------|----------|----------------------------------|---------------------------------|-------------------------------|-------------------------------------------------------------------------------------------------------------------------------------------------------------|
|                           |          |                                  |                                 |                               | message/chatbot requesting at-home testing                                                                                                                  |
| PN-Request                |          | X                                |                                 |                               | Proportion of participants in the PN condition who request patient navigation                                                                               |
| PN-Request Frequency      |          | X                                |                                 |                               | Number of times a participant requested to speak with a patient navigator                                                                                   |
| PN-Engage                 |          | X                                |                                 |                               | Proportion of participants in the PN condition who talk to a patient navigator                                                                              |
| PN-Engage Frequency       |          | X                                |                                 |                               | Number of times a participant spoke with a patient navigator                                                                                                |
| Opt-Out                   |          | X                                |                                 |                               | Proportion of participants who opted-out                                                                                                                    |
| <b>Chatbot use</b>        |          |                                  |                                 |                               |                                                                                                                                                             |
| Chatbot session length    |          | X                                |                                 |                               | Amount of time spent using the chatbot in a session                                                                                                         |
| Chatbot timeout           |          | X                                |                                 |                               | Proportion of chatbot sessions that timed out without reaching an endpoint (e.g., close chatbot window, request test, request to talk to patient navigator) |
| Chatbot actions           |          | X                                |                                 |                               | Number of chatbot topics clicked per session                                                                                                                |
| Chatbot test request only |          | X                                |                                 |                               | Proportion of chatbot session in which the only action was requesting a test                                                                                |
| Chatbot coverage          |          | X                                |                                 |                               | Proportion of chatbot contents that are accessed per session                                                                                                |
| Chatbot topics            |          | X                                |                                 |                               | Proportion of sessions in which a specific chatbot topic is accessed                                                                                        |

1  
2  
3        Statistical Analysis. The main effects of each intervention will be evaluated using a logistic  
4 regression model by regressing 90-day testing upon each of the three main effects: Chatbot (vs. TM) with  
5 an indicator for self-reporting to have a smartphone, PN (vs. no PN), and outreach frequency (10 vs. 30  
6 days). We will preliminarily include the pairwise interactions of the main effects, and the three-way  
7 interaction to assess for any synergistic and/or antagonistic effect modifications across interventions and  
8 will include any statistically significant effect modifications (i.e., interactions) in the primary analysis  
9 model. The model will adjust for whether the patient self-reported having a smartphone. Estimates and  
10 95% confidence intervals will be reported for each main effect and interaction effect. If an interaction  
11 term was included for having evidence of an effect modification, we will report the main effects  
12 separately for each level of the effect modifying intervention. The model will be run on all participants to  
13 evaluate the primary hypotheses, each tested at alpha of .0167, and it will be applied to the smartphone  
14 participants to evaluate the secondary hypotheses.

15  
16        Among the smartphone subgroup, we will fit the primary analysis model to evaluate all other  
17 main effects as a secondary analysis. We will also test the added effect of PN among those randomized to  
18 receive Chatbot. Among the remaining patients, we will regress 90-day testing upon PN (yes vs no) and  
19 outreach frequency (10 vs 30 days). We will include an interaction if a preliminary model provides  
20 evidence of an effect modification. Side-by-side, we will present the estimated effects across all patients  
21 and by smartphone ownership subgroup.

22  
23        Handling Missing Data. The primary analysis will assume missing outcomes and covariates are  
24 missing at random (MAR). Under this assumption, observed covariates can be used to explain the  
25 missingness mechanism. When conditioning on observed covariates, the distribution of outcomes is  
26 assumed to be similar among responders and non-responders. With this framework, we will omit missing  
27 outcomes,[57] multiply impute missing covariates using a fully conditional specified model,[58] and  
28 account for the multiple imputations in analysis.[59] While MAR is considered a reasonable starting point  
29 assumption for missing data, it is plausible that responders and non-responders have different outcomes  
30 beyond what can be adjusted by covariates (i.e., missing not at random; MNAR). We will use pattern  
31

1  
2  
3 mixture models as a sensitivity analysis to assess the robustness of conclusions under the MAR  
4 assumption.[60]

7 Sample Size Justification. Power for SCALE-UP II was evaluated for a target enrollment of  
8 42,000 adults aged 18 year and older who receive care at the three participating CHCs, have a valid  
9 cellphone recorded in the EHR, and have English or Spanish as their preferred language in the EHR. This  
10 estimate is based on the patient population that has received care at the three participating CHC within in  
11 the 3 years preceding the trial and who meet the inclusion criteria. Among those patients, we anticipate  
12 fewer than 10% opt outs based on prior studies using similar population health management approaches  
13 with the same CHCs.[61] Based on national estimates of smartphone ownership,[62] we assume 75% will  
14 have a smartphone and 10% to self-report as having a smartphone. Among these patients with a self-  
15 reported smartphone, we anticipate ~375 patients in each of the eight study arms. Among patients who do  
16 not self-report as having a smartphone, we expect ~8,750 patients in each of the four arms.

17  
18  
19  
20  
21  
22  
23  
24  
25  
26  
27  
28 Based on results of our previous trial using text messaging to help patients with access to  
29 COVID-19 testing,[61] we estimate that TM with no PN and a 30-day outreach will have a 5% at-home  
30 testing rate and that PN, Chatbot, and 10-day outreach frequency will increase the testing rate by 5% each  
31 without a synergistic effect. We hypothesize the at-home testing rate to be 5% less when outreach occurs  
32 every 30 days. Based on a similar trial conducted with patients from the same CHCs, we anticipate a  $\geq$   
33 40% response rate for the primary outcome.[63] Under these assumptions, with alpha adjusted to .0167,  
34 and assuming the response rate is 20%, we are at least 85% powered to test these effects. In secondary  
35 analyses, with alpha of .05 and a 40% response rate, we are 75% powered to detect the Chatbot main  
36 effect of and 68% powered to detect the added effect of PN.

### 47 **Ethics and dissemination**

48  
49 All procedures performed in studies involving human participants will be conducted in  
50 accordance with the ethical standards of the institutional research committee and with the 1964 Helsinki  
51 declaration and its later amendments or comparable ethical standards. The protocol for this study was  
52 approved by the University of Utah Institutional Review Board (00150669). Materials used to conduct the  
53  
54  
55  
56  
57  
58  
59  
60

1  
2  
3 study are not currently publicly available. Materials may be requested by emailing the corresponding  
4 author. Study results will be disseminated via peer-reviewed publications and manuscripts, as well as to  
5 the health system and community partners via lay reports and presentations.  
6  
7  
8

## 9 **DISCUSSION**

10  
11 Individuals from historically marginalized communities have suffered substantial health  
12 inequities throughout the COVID-19 pandemic, not only in terms of outcomes but also vaccination rates  
13 and access to testing.[1-8, 64, 65] PHM approaches leveraging widely adopted EHR systems and  
14 technology such as cellphones provide excellent opportunities to deliver scalable interventions to improve  
15 health equity. The SCALE-UP II trial aims to examine scalable and sustainable PHM interventions to  
16 increase the uptake of at-home COVID-19 testing among individuals who receive care from low resource  
17 CHCs. Strengths include a pragmatic trial with broad inclusion criteria leveraging existing EHR data;  
18 highly scalable automated interventions; and a novel design that compares two digital patient engagement  
19 approaches (TM and Chatbot), examines the added effect of a human-augmented intervention (patient  
20 navigation) over digital interventions, and compares two frequencies (every 10 days or 30 days) of  
21 repeated offers to receive COVID-19 testing.  
22  
23  
24  
25  
26  
27  
28  
29  
30  
31  
32  
33

34  
35 Even though public health agencies worldwide have declared the end of the COVID-19  
36 pandemic, COVID-19 testing is still critical to help reduce exposure and to identify individuals who can  
37 benefit from treatment. In addition, approaches are needed to support public health preparedness for  
38 future pandemics and outbreaks. The proposed interventions in SCALE-UP II leverage resources that are  
39 currently available at CHCs and therefore can be sustained in the long term.  
40  
41  
42  
43  
44

## 45 **Limitations**

46  
47 The study design has several limitations. First, a potentially low response rate to the introductory  
48 message asking about smartphone ownership could lead to a small sample size and randomization of only  
49 motivated individuals to the chatbot condition. We considered randomizing all participants to Chatbot vs.  
50 TM, but patients who do not have a smartphone (estimated as 25% of the CHC patient population) and  
51 are randomized to the chatbot condition would not be able to use the chatbot, compromising study reach.  
52  
53  
54  
55  
56  
57  
58  
59  
60

1  
2  
3 Second, the study relies on self-report for the primary outcome with a 90-day follow-up interval (*Testing*).  
4  
5 Patients may not recall test use and maybe less likely to self-report test use after 90 days of requesting a  
6  
7 test. However, a 90-day follow-up was chosen to give participants sufficient time to actually use a kit,  
8  
9 given that participants could request a test kit regardless of current symptoms and/or exposure, and use  
10  
11 the test whenever needed. To maximize response rates, we use two approaches to collect the primary  
12  
13 outcome: a quick question via text messaging 90 days after exposure to study interventions and a survey  
14  
15 at the end of the study, using multiple contact attempts as well as pre- and post-participation incentives.  
16  
17

18 Last, the study will be conducted after the peak of the pandemic, when participants may be less  
19  
20 motivated to learn about and receive COVID-19 testing. Also, individuals have been overexposed to  
21  
22 information about COVID-19 from multiple sources and may have already formed their opinions about  
23  
24 COVID-19 and COVID-19 testing. Therefore, it is possible that study findings may not generalize to the  
25  
26 context of new onset of a pandemic or outbreak.  
27  
28  
29

30 **Contributorship statement.** GDF, BO, TVK, JC, TG, KAK, KK, CYL, CRS, and DWW provided  
31  
32 substantial contributions to the conception of the study. All co-authors provided substantial contributions  
33  
34 to study design. GDF, BO, TVK, and JC drafted the manuscript. All co-authors reviewed the manuscript  
35  
36 critically for important intellectual content. All co-authors provided final approval of the version to be  
37  
38 published; and agreed to be accountable for all aspects of the work.  
39  
40

41 **Funding.** This work was supported by the National Institute on Minority Health and Health Disparities  
42  
43 (NIMHHD) of the U.S. National Institutes of Health (NIH) grant number 5U01MD017421.  
44

45 **Competing interests.** The authors declare no competing interests.  
46

47 **Data sharing statement.** On completion, study data will be made available in compliance with National  
48  
49 Institutes of Health data sharing policies. Results will be disseminated through study partners and peer-  
50  
51 reviewed publications.  
52  
53

## 54 55 56 REFERENCES

1. Adhikari S, Pantaleo NP, Feldman JM, Ogedegbe O, Thorpe L, Troxel AB. Assessment of Community-Level Disparities in Coronavirus Disease 2019 (COVID-19) Infections and Deaths in Large US Metropolitan Areas. *JAMA Network Open*. 2020;3(7):e2016938-e.
2. Millett GA, Jones AT, Benkeser D, Baral S, Mercer L, Beyrer C, et al. Assessing differential impacts of COVID-19 on black communities. *Ann Epidemiol*. 2020;47:37-44.
3. Webb Hooper M, Nápoles AM, Pérez-Stable EJ. COVID-19 and Racial/Ethnic Disparities. *JAMA*. 2020;323(24):2466-7.
4. Romano SD, Blackstock AJ, Taylor EV, El Burai Felix S, Adjei S, Singleton CM, et al. Trends in Racial and Ethnic Disparities in COVID-19 Hospitalizations, by Region - United States, March-December 2020. *MMWR Morb Mortal Wkly Rep*. 2021;70(15):560-5.
5. Murthy BP, Sterrett N, Weller D, Zell E, Reynolds L, Toblin RL, et al. Disparities in COVID-19 vaccination coverage between urban and rural counties—United States, December 14, 2020–April 10, 2021. *Morbidity and Mortality Weekly Report*. 2021;70(20):759.
6. Barry V, Dasgupta S, Weller DL, Kriss JL, Cadwell BL, Rose C, et al. Patterns in COVID-19 vaccination coverage, by social vulnerability and urbanicity—United States, December 14, 2020–May 1, 2021. *Morbidity and Mortality Weekly Report*. 2021;70(22):818.
7. Reitsma MB, Goldhaber-Fiebert JD, Salomon JA. Quantifying and Benchmarking Disparities in COVID-19 Vaccination Rates by Race and Ethnicity. *JAMA Network Open*. 2021;4(10):e2130343-e.
8. Williams AM, Clayton HB, Singleton JA. Racial and ethnic disparities in COVID-19 vaccination coverage: the contribution of socioeconomic and demographic factors. *American journal of preventive medicine*. 2022;62(4):473-82.
9. ABC4. COVID-19 testing site at Maverik Center closing. Retrieved from ABC4.com [Available from: <https://www.abc4.com/coronavirus/covid-19-testing-site-at-maverik-center-closing/>].
10. Miami Herald. Florida-run COVID testing sites closing at the end of May. Where can you go next? Retrieved from Miami Herald website [Available from: <https://www.miamiherald.com/news/coronavirus/article251528343.html>].
11. Mercer TR, Salit M. Testing at scale during the COVID-19 pandemic. *Nat Rev Genet*. 2021;22(7):415-26.
12. Rubin R. COVID-19 Testing Moves Out of the Clinic and Into the Home. *JAMA*. 2021;326(14):1362-4.
13. Rader B, Gertz A, Iuliano AD, Gilmer M, Wronski L, Astley CM, et al. Use of At-Home COVID-19 Tests - United States, August 23, 2021-March 12, 2022. *MMWR Morb Mortal Wkly Rep*. 2022;71(13):489-94.
14. Adler-Milstein J, Holmgren AJ, Kralovec P, Worzala C, Searcy T, Patel V. Electronic health record adoption in US hospitals: the emergence of a digital “advanced use” divide. *Journal of the American Medical Informatics Association*. 2017;24(6):1142-8.
15. Kruse CS, Kristof C, Jones B, Mitchell E, Martinez A. Barriers to electronic health record adoption: a systematic literature review. *Journal of Medical Systems*. 2016;40(12):252.
16. PEW Research Center. Mobile Fact Sheet. Retrieved from: <https://www.pewresearch.org/internet/fact-sheet/mobile/>.
17. Chan AW, Tetzlaff JM, Altman DG, Laupacis A, Gøtzsche PC, Krleža-Jerić K, et al. SPIRIT 2013 statement: defining standard protocol items for clinical trials. *Annals of internal medicine*. 2013;158(3):200-7.
18. Schlechter CR, Del Fiol G, Lam CY, Fernandez ME, Greene T, Yack M, et al. Application of community - engaged dissemination and implementation science to improve health equity. *Prev Med Rep*. 2021;24:101620.

19. Schlechter CR, Reese TJ, Wirth J, Gibson B, Kawamoto K, Siaperas T, et al. Rapid-cycle designs to adapt interventions for COVID-19 in safety-net healthcare systems. *Translational Behavioral Medicine*. 2023.
20. Henry J, Pylypchuk Y, Searcy T, Patel V. Adoption of electronic health record systems among US non-federal acute care hospitals: 2008-2015. *ONC Data Brief*. 2016;35:1-9.
21. (ONC) T0otNCfHI. Office-based Physician Electronic Health Record Adoption 2021 [updated 08/06/2021. Available from: <https://www.healthit.gov/data/quickstats/office-based-physician-electronic-health-record-adoption>.
22. National Center for Health Statistics. Ambulatory care use and physician office visit 2018 [Available from: <https://www.cdc.gov/nchs/fastats/physician-visits.htm>.
23. UDOH. Behavioral Risk Factor Surveillance System (BRFSS) data on obesity. Retrieved from Utah Department of Health, Center for Health Data and Informatics, Indicator-Based Information System for Public Health website [Available from: <http://ibis.health.utah.gov/>.
24. Ali MK, Bullard KM, Imperatore G, Benoit SR, Rolka DB, Albright AL, et al. Reach and use of diabetes prevention services in the United States, 2016-2017. *JAMA network open*. 2019;2(5):e193160-e.
25. Ariel-Donges AH, Gordon EL, Dixon BN, Eastman AJ, Bauman V, Ross KM, et al. Rural/urban disparities in access to the National Diabetes Prevention Program. *Translational behavioral medicine*. 2019.
26. McBrien KA, Ivers N, Barnieh L, Bailey JJ, Lorenzetti DL, Nicholas D, et al. Patient navigators for people with chronic disease: A systematic review. *PLoS one*. 2018;13(2):e0191980-e.
27. Peart A, Lewis V, Brown T, Russell G. Patient navigators facilitating access to primary care: a scoping review. *BMJ Open*. 2018;8(3):e019252.
28. Valaitis RK, Carter N, Lam A, Nicholl J, Feather J, Cleghorn L. Implementation and maintenance of patient navigation programs linking primary care with community-based health and social services: a scoping literature review. *BMC health services research*. 2017;17(1):116.
29. Cole-Lewis H, Kershaw T. Text messaging as a tool for behavior change in disease prevention and management. *Epidemiologic Reviews*. 2010:mxq004.
30. Gurol-Urganci I, de Jongh T, Vodopivec-Jamsek V, Atun R, Car J. Mobile phone messaging reminders for attendance at healthcare appointments. *Cochrane Database of Systematic Reviews*. 2013(12).
31. Head KJ, Noar SM, Iannarino NT, Harrington NG. Efficacy of text messaging-based interventions for health promotion: a meta-analysis. *Social science & medicine (1982)*. 2013;97:41-8.
32. Schwebel FJ, Larimer ME. Using text message reminders in health care services: A narrative literature review. *Internet Interventions*. 2018;13:82-104.
33. Vodopivec-Jamsek V, de Jongh T, Gurol-Urganci I, Atun R, Car J. Mobile phone messaging for preventive health care. *The Cochrane Library*. 2012.
34. USDHHS. Using Health Text Messages To Improve Consumer Health Knowledge, Behaviors, And Outcomes: An Environmental Scan. Rockville, MD: US Department of Health and Human Services; 2014.
35. Wetter DW. How can we help more smokers engage in evidence-based treatment? Annual Conference of the Utah Cancer Action Network; Salt Lake City, UT2017.
36. Anderson M. Mobile technology and home broadband. Retrieved from <https://www.pewresearch.org/internet/2019/06/13/mobile-technology-and-home-broadband-2019/>. Contract No.: 05/14/2020.
37. PEW Research Center. Internet/Broadband fact sheet. Retrieved from <https://www.pewresearch.org/internet/fact-sheet/internet-broadband/>.



- 1  
2  
3 38. Kocaballi AB, Berkovsky S, Quiroz JC, Laranjo L, Tong HL, Rezazadegan D, et al. The  
4 Personalization of Conversational Agents in Health Care: Systematic Review. *J Med Internet Res.*  
5 2019;21(11):e15360.  
6  
7 39. Judson TJ, Odisho AY, Neinstein AB, Chao J, Williams A, Miller C, et al. Rapid design and  
8 implementation of an integrated patient self-triage and self-scheduling tool for COVID-19. *Journal of the*  
9 *American Medical Informatics Association.* 2020;27(6):860-6.  
10 40. Judson TJ, Odisho AY, Young JJ, Bigazzi O, Steuer D, Gonzales R, et al. Implementation of a digital  
11 chatbot to screen health system employees during the COVID-19 pandemic. *Journal of the American*  
12 *Medical Informatics Association.* 2020;27(9):1450-5.  
13 41. McKillop M, South BR, Preininger A, Mason M, Jackson GP. Leveraging conversational  
14 technology to answer common COVID-19 questions. *Journal of the American Medical Informatics*  
15 *Association.* 2021;28(4):850-5.  
16 42. Dennis AR, Kim A, Rahimi M, Ayabakan S. User reactions to COVID-19 screening chatbots from  
17 reputable providers. *Journal of the American Medical Informatics Association.* 2020;27(11):1727-31.  
18 43. Ford D, Harvey JB, McElligott J, King K, Simpson KN, Valenta S, et al. Leveraging health system  
19 telehealth and informatics infrastructure to create a continuum of services for COVID-19 screening,  
20 testing, and treatment. *Journal of the American Medical Informatics Association.* 2020;27(12):1871-7.  
21 44. Martin A, Nateqi J, Gruarin S, Munsch N, Abdarahmane I, Zobel M, et al. An artificial intelligence-  
22 based first-line defence against COVID-19: digitally screening citizens for risks via a chatbot. *Scientific*  
23 *Reports.* 2020;10(1):19012.  
24 45. Correa-Fernández V, Díaz-Toro EC, Reitzel LR, Guo L, Chen M, Li Y, et al. Combined treatment for  
25 at-risk drinking and smoking cessation among Puerto Ricans: A randomized clinical trial. *Addictive*  
26 *Behaviors.* 2017;65:185-92.  
27 46. McClure JB, Westbrook E, Curry SJ, Wetter DW. Proactive, motivationally enhanced smoking  
28 cessation counseling among women with elevated cervical cancer risk. *Nicotine & Tobacco Research.*  
29 2005;7(6):881-9.  
30 47. Reitzel LR, Vidrine JI, Businelle MS, Kendzor DE, Costello TJ, Li Y, et al. Preventing postpartum  
31 smoking relapse among diverse low-income women: a randomized clinical trial. *Nicotine Tob Res.*  
32 2010;12(4):326-35.  
33 48. Vidrine JI, Reitzel LR, Figueroa P, Velasquez MM, Mazas CA, Cinciripini PM, et al. Motivation And  
34 Problem Solving (MAPS): Motivationally-based skills training for treating substance use. *Cogn Behav*  
35 *Pract.* 2013;20(4):501-16.  
36 49. Vinci C, Lam CY, Schlechter CR, Shono Y, Vidrine JI, Wetter DW. Increasing treatment  
37 engagement among smokers who are not motivated to quit: A randomized clinical trial. In preparation.  
38 50. Wetter DW, Mazas C, Daza P, Nguyen L, Fouladi RT, Li Y, et al. Reaching and treating Spanish-  
39 speaking smokers through the National Cancer Institute's Cancer Information Service. A randomized  
40 controlled trial. *Cancer.* 2007;109(2 Suppl):406-13.  
41 51. Miller WR, Rollnick S. *Motivational Interviewing: Preparing People to Change Addictive Behavior.*  
42 New York: The Guildford Press; 1991.  
43 52. Miller WR, Rollnick S. *Motivational Interviewing (2nd edition).* New York: The Guilford Press;  
44 2002.  
45 53. Marlatt G, Donovan D, editors. *Relapse prevention: Maintenance Strategies in the Treatment of*  
46 *Addictive Behaviors (2nd edition).* New York: Guilford Press; 2005.  
47 54. Witkiewitz K, Marlatt GA. Relapse prevention for alcohol and drug problems: That was Zen, this  
48 is Tao. *American Psychologist.* 2004;59(4):224-35.  
49 55. CDC. *Telephone Quitlines: A Resource for Development, Implementation, and Evaluation.*  
50 Atlanta, GA: U.S. Department of Health and Human Services, Centers for Disease Control and  
51  
52  
53  
54  
55  
56  
57  
58  
59  
60

1  
2  
3 Prevention, National Center for Chronic Disease Prevention and Health Promotion, Office of Smoking  
4 and Health, Final Edition,; 2004 September

5 56. Rubinstein YR, McInnes P. NIH/NCATS/GRDR® Common Data Elements: A leading force for  
6 standardized data collection. *Contemp Clin Trials*. 2015;42:78-80.

7 57. Little RJ, Rubin DB. *Statistical analysis with missing data*: John Wiley & Sons; 2019.

8 58. van Buuren S. Multiple imputation of discrete and continuous data by fully conditional  
9 specification. *Stat Methods Med Res*. 2007;16(3):219-42.

10 59. Toutenburg H. Rubin, DB: *Multiple imputation for nonresponse in surveys*: Wiley, New York  
11 1987. XXIX+ 258 pp. Springer; 1990.

12 60. Cro S, Morris TP, Kenward MG, Carpenter JR. Sensitivity analysis for clinical trials with missing  
13 continuous outcome data using controlled multiple imputation: A practical guide. *Stat Med*.  
14 2020;39(21):2815-42.

15 61. Schlechter CR, Del Fiol G, Wetter DW, editors. *Rapid and responsive interventions to address  
16 covid-19 and promote health equity*. 15th Annual Conference of Dissemination and Implementation in  
17 Health 2022; Washington, DC: AcademyHealth.

18 62. Center PR. *Mobile Fact Sheet 2021* [updated 04/07/2021. Available from:  
19 <https://www.pewresearch.org/internet/fact-sheet/mobile/>.

20 63. Fernandez ME, Schlechter CR, Del Fiol G, Gibson B, Kawamoto K, Siaperas T, et al. *QuitSMART  
21 Utah: an implementation study protocol for a cluster-randomized, multi-level Sequential Multiple  
22 Assignment Randomized Trial to increase Reach and Impact of tobacco cessation treatment in  
23 Community Health Centers*. *Implement Sci*. 2020;15(1):9.

24 64. Khullar D, Zhang Y, Zang C, Xu Z, Wang F, Weiner MG, et al. *Racial/Ethnic Disparities in Post-  
25 acute Sequelae of SARS-CoV-2 Infection in New York: an EHR-Based Cohort Study from the RECOVER  
26 Program*. *J Gen Intern Med*. 2023;38(5):1127-36.

27 65. Pfaff ER, Madlock-Brown C, Baratta JM, Bhatia A, Davis H, Girvin A, et al. *Coding long COVID:  
28 characterizing a new disease through an ICD-10 lens*. *BMC Med*. 2023;21(1):58.  
29  
30  
31  
32  
33  
34  
35  
36  
37  
38  
39  
40  
41  
42  
43  
44  
45  
46  
47  
48  
49  
50  
51  
52  
53  
54  
55  
56  
57  
58  
59  
60

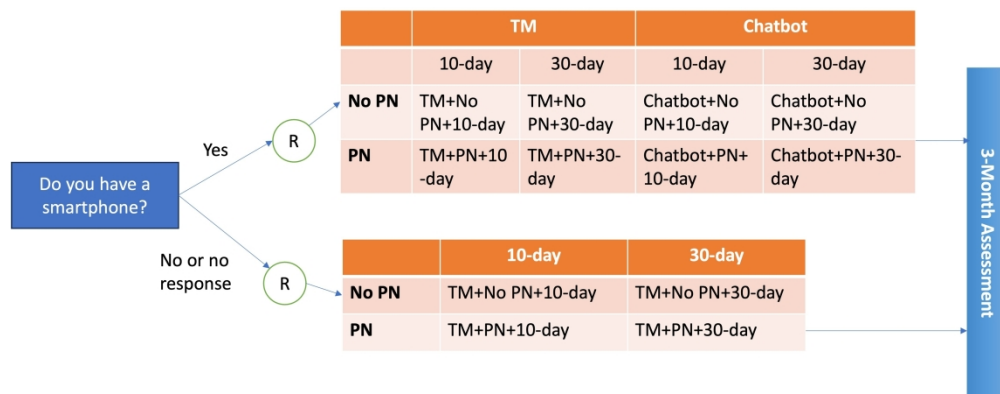

R=randomization; PN=patient navigation; TM=text messaging

Figure 1 – SCALE-UP II Trial Design

327x144mm (300 x 300 DPI)

1  
2  
3  
4  
5  
6  
7  
8  
9  
10  
11  
12  
13  
14  
15  
16  
17  
18  
19  
20  
21  
22  
23  
24  
25  
26  
27  
28  
29  
30  
31  
32  
33  
34  
35  
36  
37  
38  
39  
40  
41  
42  
43  
44  
45  
46  
47  
48  
49  
50  
51  
52  
53  
54  
55  
56  
57  
58  
59  
60

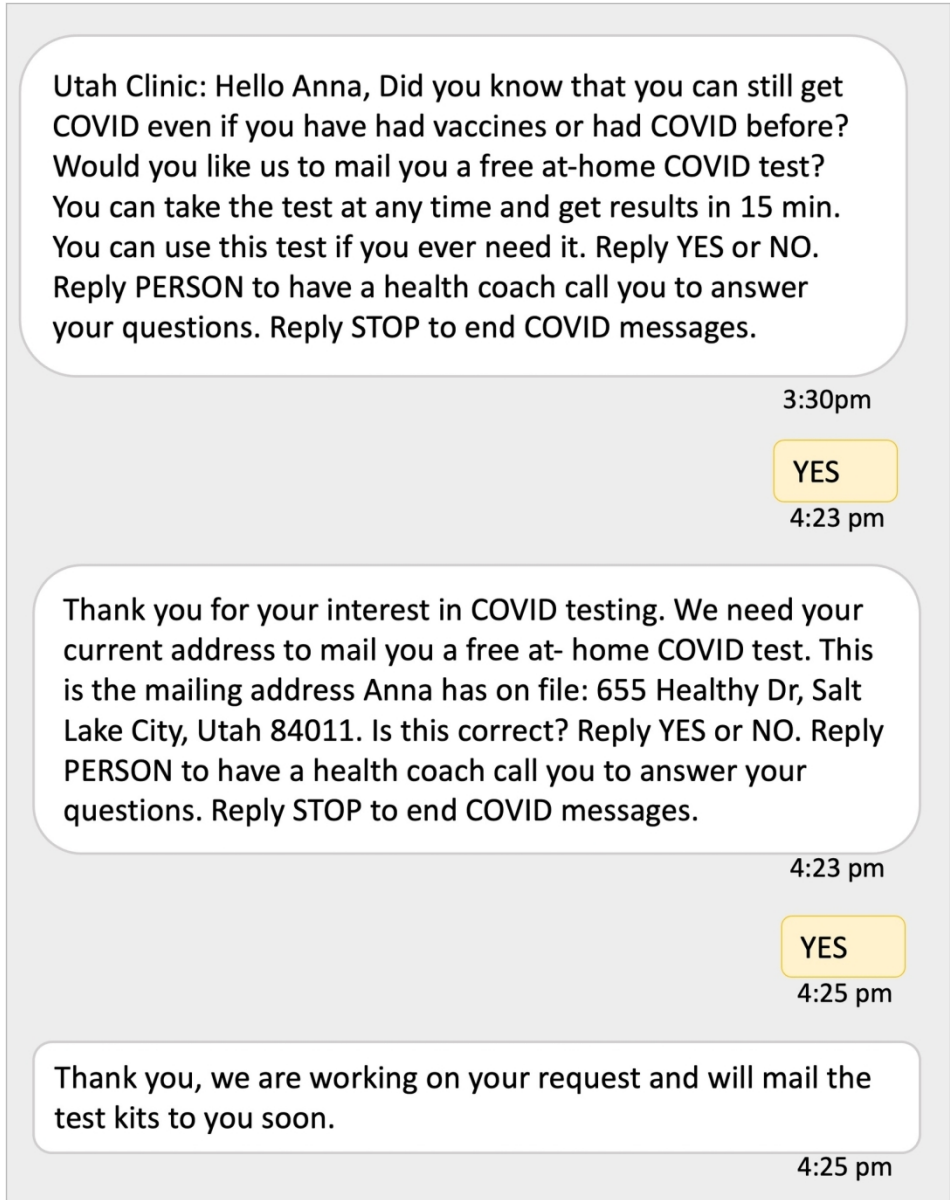

Figure 2 – Sample text message conversation offering COVID-19 at-home testing.

149x188mm (300 x 300 DPI)



Figure 3 – Sequential screenshot of chatbot intervention showing a question being answered, followed by options to ask further questions, and request a COVID-19 test kit to be mailed to the patient’s home.

101x81mm (220 x 220 DPI)

# Reporting checklist for protocol of a clinical trial.

Based on the SPIRIT guidelines.

## Instructions to authors

Complete this checklist by entering the page numbers from your manuscript where readers will find each of the items listed below.

Your article may not currently address all the items on the checklist. Please modify your text to include the missing information. If you are certain that an item does not apply, please write "n/a" and provide a short explanation.

Upload your completed checklist as an extra file when you submit to a journal.

In your methods section, say that you used the SPIRIT reporting guidelines, and cite them as:

Chan A-W, Tetzlaff JM, Gøtzsche PC, Altman DG, Mann H, Berlin J, Dickersin K, Hróbjartsson A, Schulz KF, Parulekar WR, Krleža-Jerić K, Laupacis A, Moher D. SPIRIT 2013 Explanation and Elaboration: Guidance for protocols of clinical trials. *BMJ*. 2013;346:e7586

|                                             |                     | Reporting Item                                                                                               | Page Number |
|---------------------------------------------|---------------------|--------------------------------------------------------------------------------------------------------------|-------------|
| <b>Administrative information</b>           |                     |                                                                                                              |             |
| Title                                       | <a href="#">#1</a>  | Descriptive title identifying the study design, population, interventions, and, if applicable, trial acronym | 1           |
| Trial registration                          | <a href="#">#2a</a> | Trial identifier and registry name. If not yet registered, name of intended registry                         | 2           |
| Trial registration: data set                | <a href="#">#2b</a> | All items from the World Health Organization Trial Registration Data Set                                     | 2           |
| Protocol version                            | <a href="#">#3</a>  | Date and version identifier                                                                                  | 2           |
| Funding                                     | <a href="#">#4</a>  | Sources and types of financial, material, and other support                                                  | 18          |
| Roles and responsibilities: contributorship | <a href="#">#5a</a> | Names, affiliations, and roles of protocol contributors                                                      | 1           |

|    |                           |                     |                                                                    |         |
|----|---------------------------|---------------------|--------------------------------------------------------------------|---------|
| 1  | Roles and                 | <a href="#">#5b</a> | Name and contact information for the trial sponsor                 | 18      |
| 2  | responsibilities:         |                     |                                                                    |         |
| 3  | sponsor contact           |                     |                                                                    |         |
| 4  | information               |                     |                                                                    |         |
| 5  |                           |                     |                                                                    |         |
| 6  |                           |                     |                                                                    |         |
| 7  |                           |                     |                                                                    |         |
| 8  | Roles and                 | <a href="#">#5c</a> | Role of study sponsor and funders, if any, in study design;        | 18      |
| 9  | responsibilities:         |                     | collection, management, analysis, and interpretation of data;      |         |
| 10 | sponsor and funder        |                     | writing of the report; and the decision to submit the report for   |         |
| 11 |                           |                     | publication, including whether they will have ultimate authority   |         |
| 12 |                           |                     | over any of these activities                                       |         |
| 13 |                           |                     |                                                                    |         |
| 14 |                           |                     |                                                                    |         |
| 15 |                           |                     |                                                                    |         |
| 16 | Roles and                 | <a href="#">#5d</a> | Composition, roles, and responsibilities of the coordinating       | 5       |
| 17 | responsibilities:         |                     | centre, steering committee, endpoint adjudication committee,       |         |
| 18 | committees                |                     | data management team, and other individuals or groups              |         |
| 19 |                           |                     | overseeing the trial, if applicable (see Item 21a for data         |         |
| 20 |                           |                     | monitoring committee)                                              |         |
| 21 |                           |                     |                                                                    |         |
| 22 |                           |                     |                                                                    |         |
| 23 |                           |                     |                                                                    |         |
| 24 | <b>Introduction</b>       |                     |                                                                    |         |
| 25 |                           |                     |                                                                    |         |
| 26 |                           |                     |                                                                    |         |
| 27 | Background and            | <a href="#">#6a</a> | Description of research question and justification for undertaking | 4 and 5 |
| 28 | rationale                 |                     | the trial, including summary of relevant studies (published and    |         |
| 29 |                           |                     | unpublished) examining benefits and harms for each intervention    |         |
| 30 |                           |                     |                                                                    |         |
| 31 |                           |                     |                                                                    |         |
| 32 | Background and            | <a href="#">#6b</a> | Explanation for choice of comparators                              | 5-7     |
| 33 | rationale: choice of      |                     |                                                                    |         |
| 34 | comparators               |                     |                                                                    |         |
| 35 |                           |                     |                                                                    |         |
| 36 |                           |                     |                                                                    |         |
| 37 | Objectives                | <a href="#">#7</a>  | Specific objectives or hypotheses                                  | 12      |
| 38 |                           |                     |                                                                    |         |
| 39 |                           |                     |                                                                    |         |
| 40 | Trial design              | <a href="#">#8</a>  | Description of trial design including type of trial (eg, parallel  | 5       |
| 41 |                           |                     | group, crossover, factorial, single group), allocation ratio, and  |         |
| 42 |                           |                     | framework (eg, superiority, equivalence, non-inferiority,          |         |
| 43 |                           |                     | exploratory)                                                       |         |
| 44 |                           |                     |                                                                    |         |
| 45 |                           |                     |                                                                    |         |
| 46 | <b>Methods:</b>           |                     |                                                                    |         |
| 47 | <b>Participants,</b>      |                     |                                                                    |         |
| 48 | <b>interventions, and</b> |                     |                                                                    |         |
| 49 | <b>outcomes</b>           |                     |                                                                    |         |
| 50 |                           |                     |                                                                    |         |
| 51 |                           |                     |                                                                    |         |
| 52 |                           |                     |                                                                    |         |
| 53 | Study setting             | <a href="#">#9</a>  | Description of study settings (eg, community clinic, academic      | 7       |
| 54 |                           |                     | hospital) and list of countries where data will be collected.      |         |
| 55 |                           |                     | Reference to where list of study sites can be obtained             |         |
| 56 |                           |                     |                                                                    |         |
| 57 |                           |                     |                                                                    |         |
| 58 |                           |                     |                                                                    |         |
| 59 | Eligibility criteria      | <a href="#">#10</a> | Inclusion and exclusion criteria for participants. If applicable,  | 7       |
| 60 |                           |                     |                                                                    |         |

eligibility criteria for study centres and individuals who will perform the interventions (eg, surgeons, psychotherapists)

|    |                      |                      |                                                                    |
|----|----------------------|----------------------|--------------------------------------------------------------------|
| 1  |                      |                      |                                                                    |
| 2  |                      |                      |                                                                    |
| 3  |                      |                      |                                                                    |
| 4  | Interventions:       | <a href="#">#11a</a> | Interventions for each group with sufficient detail to allow       |
| 5  | description          |                      | replication, including how and when they will be administered      |
| 6  |                      |                      |                                                                    |
| 7  |                      |                      |                                                                    |
| 8  | Interventions:       | <a href="#">#11b</a> | Criteria for discontinuing or modifying allocated interventions    |
| 9  | modifications        |                      | for a given trial participant (eg, drug dose change in response to |
| 10 |                      |                      | harms, participant request, or improving / worsening disease)      |
| 11 |                      |                      |                                                                    |
| 12 |                      |                      |                                                                    |
| 13 | Interventions:       | <a href="#">#11c</a> | Strategies to improve adherence to intervention protocols, and     |
| 14 | adherence            |                      | any procedures for monitoring adherence (eg, drug tablet return;   |
| 15 |                      |                      | laboratory tests)                                                  |
| 16 |                      |                      |                                                                    |
| 17 |                      |                      |                                                                    |
| 18 | Interventions:       | <a href="#">#11d</a> | Relevant concomitant care and interventions that are permitted     |
| 19 | concomitant care     |                      | or prohibited during the trial                                     |
| 20 |                      |                      |                                                                    |
| 21 |                      |                      |                                                                    |
| 22 | Outcomes             | <a href="#">#12</a>  | Primary, secondary, and other outcomes, including the specific     |
| 23 |                      |                      | measurement variable (eg, systolic blood pressure), analysis       |
| 24 |                      |                      | metric (eg, change from baseline, final value, time to event),     |
| 25 |                      |                      | method of aggregation (eg, median, proportion), and time point     |
| 26 |                      |                      | for each outcome. Explanation of the clinical relevance of         |
| 27 |                      |                      | chosen efficacy and harm outcomes is strongly recommended          |
| 28 |                      |                      |                                                                    |
| 29 |                      |                      |                                                                    |
| 30 |                      |                      |                                                                    |
| 31 |                      |                      |                                                                    |
| 32 | Participant timeline | <a href="#">#13</a>  | Time schedule of enrolment, interventions (including any run-ins   |
| 33 |                      |                      | and washouts), assessments, and visits for participants. A         |
| 34 |                      |                      | schematic diagram is highly recommended (see Figure)               |
| 35 |                      |                      |                                                                    |
| 36 |                      |                      |                                                                    |
| 37 | Sample size          | <a href="#">#14</a>  | Estimated number of participants needed to achieve study           |
| 38 |                      |                      | objectives and how it was determined, including clinical and       |
| 39 |                      |                      | statistical assumptions supporting any sample size calculations    |
| 40 |                      |                      |                                                                    |
| 41 |                      |                      |                                                                    |
| 42 |                      |                      |                                                                    |
| 43 | Recruitment          | <a href="#">#15</a>  | Strategies for achieving adequate participant enrolment to reach   |
| 44 |                      |                      | target sample size                                                 |
| 45 |                      |                      |                                                                    |

**Methods: Assignment  
of interventions (for  
controlled trials)**

|    |                      |                      |                                                                  |
|----|----------------------|----------------------|------------------------------------------------------------------|
| 51 |                      |                      |                                                                  |
| 52 | Allocation: sequence | <a href="#">#16a</a> | Method of generating the allocation sequence (eg, computer-      |
| 53 | generation           |                      | generated random numbers), and list of any factors for           |
| 54 |                      |                      | stratification. To reduce predictability of a random sequence,   |
| 55 |                      |                      | details of any planned restriction (eg, blocking) should be      |
| 56 |                      |                      | provided in a separate document that is unavailable to those who |
| 57 |                      |                      |                                                                  |
| 58 |                      |                      |                                                                  |
| 59 |                      |                      |                                                                  |



|    |                        |                                                                                        |       |
|----|------------------------|----------------------------------------------------------------------------------------|-------|
|    |                        | enrol participants or assign interventions                                             |       |
| 1  |                        |                                                                                        |       |
| 2  | Allocation             | <a href="#">#16b</a> Mechanism of implementing the allocation sequence (eg, central    | 7-8   |
| 3  | concealment            | telephone; sequentially numbered, opaque, sealed envelopes),                           |       |
| 4  | mechanism              | describing any steps to conceal the sequence until interventions                       |       |
| 5  |                        | are assigned                                                                           |       |
| 6  |                        |                                                                                        |       |
| 7  |                        |                                                                                        |       |
| 8  |                        |                                                                                        |       |
| 9  | Allocation:            | <a href="#">#16c</a> Who will generate the allocation sequence, who will enrol         | 7-8   |
| 10 | implementation         | participants, and who will assign participants to interventions                        |       |
| 11 |                        |                                                                                        |       |
| 12 |                        |                                                                                        |       |
| 13 | Blinding (masking)     | <a href="#">#17a</a> Who will be blinded after assignment to interventions (eg, trial  | 7-8   |
| 14 |                        | participants, care providers, outcome assessors, data analysts),                       |       |
| 15 |                        | and how                                                                                |       |
| 16 |                        |                                                                                        |       |
| 17 |                        |                                                                                        |       |
| 18 | Blinding (masking):    | <a href="#">#17b</a> If blinded, circumstances under which unblinding is permissible,  | NA    |
| 19 | emergency unblinding   | and procedure for revealing a participant's allocated intervention                     |       |
| 20 |                        | during the trial                                                                       |       |
| 21 |                        |                                                                                        |       |
| 22 |                        |                                                                                        |       |
| 23 |                        |                                                                                        |       |
| 24 | <b>Methods: Data</b>   |                                                                                        |       |
| 25 | <b>collection,</b>     |                                                                                        |       |
| 26 | <b>management, and</b> |                                                                                        |       |
| 27 | <b>analysis</b>        |                                                                                        |       |
| 28 |                        |                                                                                        |       |
| 29 |                        |                                                                                        |       |
| 30 | Data collection plan   | <a href="#">#18a</a> Plans for assessment and collection of outcome, baseline, and     | 13-15 |
| 31 |                        | other trial data, including any related processes to promote data                      |       |
| 32 |                        | quality (eg, duplicate measurements, training of assessors) and a                      |       |
| 33 |                        | description of study instruments (eg, questionnaires, laboratory                       |       |
| 34 |                        | tests) along with their reliability and validity, if known.                            |       |
| 35 |                        | Reference to where data collection forms can be found, if not in                       |       |
| 36 |                        | the protocol                                                                           |       |
| 37 |                        |                                                                                        |       |
| 38 |                        |                                                                                        |       |
| 39 |                        |                                                                                        |       |
| 40 |                        |                                                                                        |       |
| 41 |                        |                                                                                        |       |
| 42 | Data collection plan:  | <a href="#">#18b</a> Plans to promote participant retention and complete follow-up,    | 13-15 |
| 43 | retention              | including list of any outcome data to be collected for participants                    |       |
| 44 |                        | who discontinue or deviate from intervention protocols                                 |       |
| 45 |                        |                                                                                        |       |
| 46 |                        |                                                                                        |       |
| 47 | Data management        | <a href="#">#19</a> Plans for data entry, coding, security, and storage, including any | 13-15 |
| 48 |                        | related processes to promote data quality (eg, double data entry;                      |       |
| 49 |                        | range checks for data values). Reference to where details of data                      |       |
| 50 |                        | management procedures can be found, if not in the protocol                             |       |
| 51 |                        |                                                                                        |       |
| 52 |                        |                                                                                        |       |
| 53 |                        |                                                                                        |       |
| 54 | Statistics: outcomes   | <a href="#">#20a</a> Statistical methods for analysing primary and secondary           | 12-17 |
| 55 |                        | outcomes. Reference to where other details of the statistical                          |       |
| 56 |                        | analysis plan can be found, if not in the protocol                                     |       |
| 57 |                        |                                                                                        |       |
| 58 |                        |                                                                                        |       |
| 59 |                        |                                                                                        |       |
| 60 |                        |                                                                                        |       |

|    |                            |                      |                                                                    |       |
|----|----------------------------|----------------------|--------------------------------------------------------------------|-------|
| 1  | Statistics: additional     | <a href="#">#20b</a> | Methods for any additional analyses (eg, subgroup and adjusted     | 12-17 |
| 2  | analyses                   |                      | analyses)                                                          |       |
| 3  |                            |                      |                                                                    |       |
| 4  | Statistics: analysis       | <a href="#">#20c</a> | Definition of analysis population relating to protocol non-        | 16    |
| 5  | population and missing     |                      | adherence (eg, as randomised analysis), and any statistical        |       |
| 6  | data                       |                      | methods to handle missing data (eg, multiple imputation)           |       |
| 7  |                            |                      |                                                                    |       |
| 8  |                            |                      |                                                                    |       |
| 9  |                            |                      |                                                                    |       |
| 10 | <b>Methods: Monitoring</b> |                      |                                                                    |       |
| 11 |                            |                      |                                                                    |       |
| 12 | Data monitoring:           | <a href="#">#21a</a> | Composition of data monitoring committee (DMC); summary of         | NA    |
| 13 | formal committee           |                      | its role and reporting structure; statement of whether it is       |       |
| 14 |                            |                      | independent from the sponsor and competing interests; and          |       |
| 15 |                            |                      | reference to where further details about its charter can be found, |       |
| 16 |                            |                      | if not in the protocol. Alternatively, an explanation of why a     |       |
| 17 |                            |                      | DMC is not needed                                                  |       |
| 18 |                            |                      |                                                                    |       |
| 19 |                            |                      |                                                                    |       |
| 20 |                            |                      |                                                                    |       |
| 21 |                            |                      |                                                                    |       |
| 22 | Data monitoring:           | <a href="#">#21b</a> | Description of any interim analyses and stopping guidelines,       | NA    |
| 23 | interim analysis           |                      | including who will have access to these interim results and make   |       |
| 24 |                            |                      | the final decision to terminate the trial                          |       |
| 25 |                            |                      |                                                                    |       |
| 26 |                            |                      |                                                                    |       |
| 27 | Harms                      | <a href="#">#22</a>  | Plans for collecting, assessing, reporting, and managing solicited | NA    |
| 28 |                            |                      | and spontaneously reported adverse events and other unintended     |       |
| 29 |                            |                      | effects of trial interventions or trial conduct                    |       |
| 30 |                            |                      |                                                                    |       |
| 31 |                            |                      |                                                                    |       |
| 32 |                            |                      |                                                                    |       |
| 33 | Auditing                   | <a href="#">#23</a>  | Frequency and procedures for auditing trial conduct, if any, and   | NA    |
| 34 |                            |                      | whether the process will be independent from investigators and     |       |
| 35 |                            |                      | the sponsor                                                        |       |
| 36 |                            |                      |                                                                    |       |
| 37 |                            |                      |                                                                    |       |
| 38 | <b>Ethics and</b>          |                      |                                                                    |       |
| 39 | <b>dissemination</b>       |                      |                                                                    |       |
| 40 |                            |                      |                                                                    |       |
| 41 |                            |                      |                                                                    |       |
| 42 | Research ethics            | <a href="#">#24</a>  | Plans for seeking research ethics committee / institutional review | 5     |
| 43 | approval                   |                      | board (REC / IRB) approval                                         |       |
| 44 |                            |                      |                                                                    |       |
| 45 |                            |                      |                                                                    |       |
| 46 | Protocol amendments        | <a href="#">#25</a>  | Plans for communicating important protocol modifications (eg,      | 5     |
| 47 |                            |                      | changes to eligibility criteria, outcomes, analyses) to relevant   |       |
| 48 |                            |                      | parties (eg, investigators, REC / IRBs, trial participants, trial  |       |
| 49 |                            |                      | registries, journals, regulators)                                  |       |
| 50 |                            |                      |                                                                    |       |
| 51 |                            |                      |                                                                    |       |
| 52 |                            |                      |                                                                    |       |
| 53 | Consent or assent          | <a href="#">#26a</a> | Who will obtain informed consent or assent from potential trial    | 7     |
| 54 |                            |                      | participants or authorised surrogates, and how (see Item 32)       |       |
| 55 |                            |                      |                                                                    |       |
| 56 |                            |                      |                                                                    |       |
| 57 | Consent or assent:         | <a href="#">#26b</a> | Additional consent provisions for collection and use of            | 7     |
| 58 | ancillary studies          |                      | participant data and biological specimens in ancillary studies, if |       |
| 59 |                            |                      |                                                                    |       |
| 60 |                            |                      |                                                                    |       |

applicable

|    |                          |                                                                      |            |
|----|--------------------------|----------------------------------------------------------------------|------------|
| 1  |                          |                                                                      |            |
| 2  |                          |                                                                      |            |
| 3  | Confidentiality          | <a href="#">#27</a>                                                  | 7          |
| 4  |                          | How personal information about potential and enrolled                |            |
| 5  |                          | participants will be collected, shared, and maintained in order to   |            |
| 6  |                          | protect confidentiality before, during, and after the trial          |            |
| 7  |                          |                                                                      |            |
| 8  | Declaration of interests | <a href="#">#28</a>                                                  | 18         |
| 9  |                          | Financial and other competing interests for principal                |            |
| 10 |                          | investigators for the overall trial and each study site              |            |
| 11 |                          |                                                                      |            |
| 12 | Data access              | <a href="#">#29</a>                                                  | 2          |
| 13 |                          | Statement of who will have access to the final trial dataset, and    |            |
| 14 |                          | disclosure of contractual agreements that limit such access for      |            |
| 15 |                          | investigators                                                        |            |
| 16 |                          |                                                                      |            |
| 17 | Ancillary and post trial | <a href="#">#30</a>                                                  | NA         |
| 18 | care                     | Provisions, if any, for ancillary and post-trial care, and for       |            |
| 19 |                          | compensation to those who suffer harm from trial participation       |            |
| 20 |                          |                                                                      |            |
| 21 | Dissemination policy:    | <a href="#">#31a</a>                                                 | 18         |
| 22 | trial results            | Plans for investigators and sponsor to communicate trial results     |            |
| 23 |                          | to participants, healthcare professionals, the public, and other     |            |
| 24 |                          | relevant groups (eg, via publication, reporting in results           |            |
| 25 |                          | databases, or other data sharing arrangements), including any        |            |
| 26 |                          | publication restrictions                                             |            |
| 27 |                          |                                                                      |            |
| 28 |                          |                                                                      |            |
| 29 | Dissemination policy:    | <a href="#">#31b</a>                                                 | NA         |
| 30 | authorship               | Authorship eligibility guidelines and any intended use of            |            |
| 31 |                          | professional writers                                                 |            |
| 32 |                          |                                                                      |            |
| 33 | Dissemination policy:    | <a href="#">#31c</a>                                                 | 18         |
| 34 | reproducible research    | Plans, if any, for granting public access to the full protocol,      |            |
| 35 |                          | participant-level dataset, and statistical code                      |            |
| 36 |                          |                                                                      |            |
| 37 | <b>Appendices</b>        |                                                                      |            |
| 38 |                          |                                                                      |            |
| 39 | Informed consent         | <a href="#">#32</a>                                                  | supplement |
| 40 | materials                | Model consent form and other related documentation given to          |            |
| 41 |                          | participants and authorised surrogates                               |            |
| 42 |                          |                                                                      |            |
| 43 | Biological specimens     | <a href="#">#33</a>                                                  | NA         |
| 44 |                          | Plans for collection, laboratory evaluation, and storage of          |            |
| 45 |                          | biological specimens for genetic or molecular analysis in the        |            |
| 46 |                          | current trial and for future use in ancillary studies, if applicable |            |
| 47 |                          |                                                                      |            |

48 The SPIRIT Explanation and Elaboration paper is distributed under the terms of the Creative Commons  
 49 Attribution License CC-BY-NC. This checklist was completed on 27. October 2023 using  
 50 <https://www.goodreports.org/>, a tool made by the [EQUATOR Network](#) in collaboration with [Penelope.ai](#)  
 51  
 52  
 53  
 54  
 55  
 56  
 57  
 58  
 59
